# Emergence of persistent and sequential representations in the hippocampal-prefrontal circuitry during associative learning

Bryan C. Souza<sup>1,†</sup>, Jan L. Klee<sup>1</sup>, Luca Mazzucato<sup>2,†,\*</sup> and Francesco P. Battaglia<sup>1,†,\*</sup>

<sup>1</sup>Donders Institute for Brain, Cognition and Behaviour, Radboud University, Nijmegen, the Netherlands

<sup>2</sup>Institute of Neuroscience, University of Oregon, USA

†Correspondence: [bryan.dacostasouza@donders.ru.nl](mailto:bryan.dacostasouza@donders.ru.nl) (B.C.S.), [lmazzuca@uoregon.edu](mailto:lmazzuca@uoregon.edu) (L.M.), [f.battaglia@science.ru.nl](mailto:f.battaglia@science.ru.nl) (F.P.B.)

\*These authors contributed equally to this work.

## Abstract

1 Temporal associations between sensory stimuli separated in time rely on the interaction between the hippocam-  
2 pus and medial prefrontal cortex (mPFC). However, it is not known how changes in their neural activity support  
3 the emergence of temporal association learning. Here, we use simultaneous electrophysiological recordings in  
4 the hippocampal CA1 region and mPFC of mice to elucidate the neural dynamics underlying memory formation  
5 in an auditory trace conditioning task. We found that in both areas conditioned (CS+/CS-) and unconditioned  
6 stimuli (US) evoked similar temporal sequences of neural responses that progressively diverged during learning.  
7 Additionally, persistent CS representations emerged in mPFC after learning, supported by CS+ coding states  
8 whose transient reactivation reliably predicted lick onset and behavioral performance on single trials. These  
9 results show that coordination of temporal sequences in CA1 and persistent activity in mPFC may underlie  
10 temporal association learning, and that transient reactivations of engrams in mPFC predict the animal behavior.

## Highlights

- 11 • Temporal representation of CS+, but not CS- and US, strengthens in CA1 after learning.
- 12 • Similarity between stimulus and reward temporal representations decrease with learning, but is recovered
- 13 in error trials.
- 14 • Representation of stimulus identity is strong and stable in PFC since stimulus onset, while it only emerges
- 15 in CA1 during trace period.
- 16 • Neural states defined on faster time-scales reveal the emergence of CS coding states in PFC whose onset
- 17 predicts lick times and task performance.
- 18 • PFC-CA1 states do not increase coordination during late CS+ stimulus and trace.

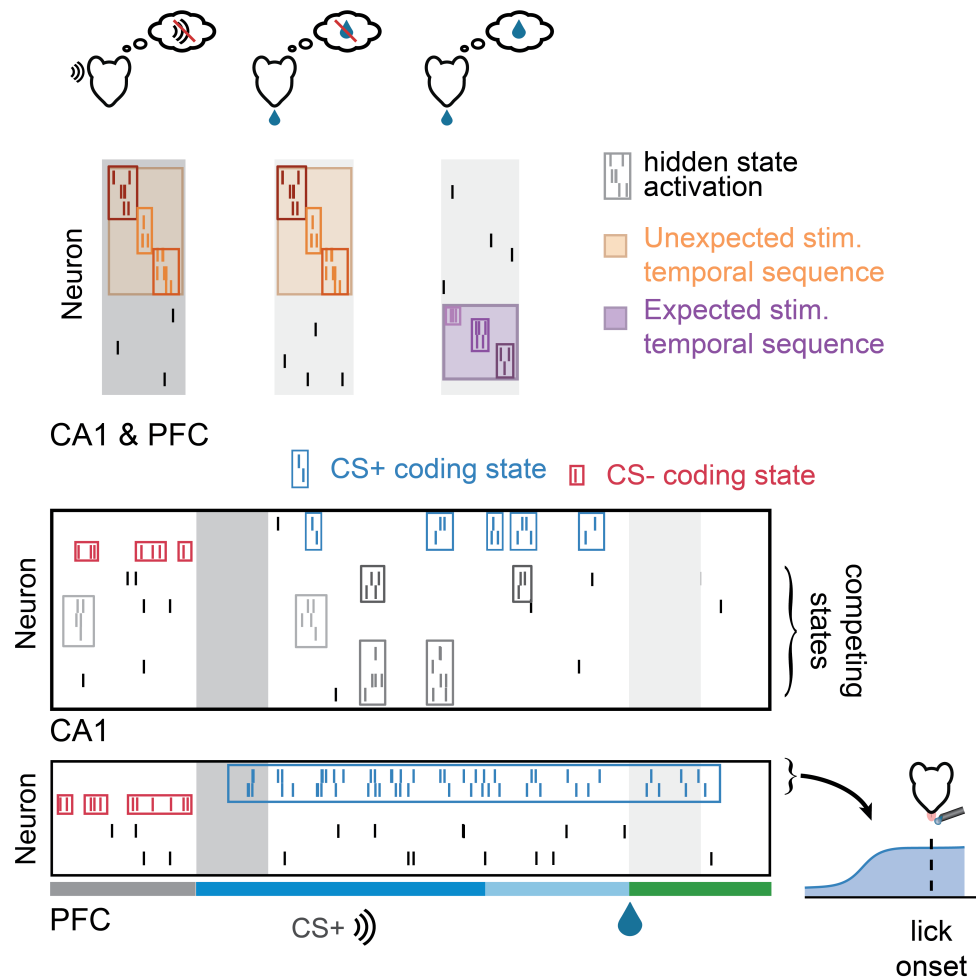

Figure 0: Graphical Abstract

## Introduction

19 The hippocampus and the medial prefrontal cortex (mPFC) are both known to have important roles in sensory  
20 and memory representations. For instance, the hippocampus integrates multiple sensory inputs coming from the  
21 entorhinal cortex, bridging the 'what', 'where' and 'when' components of a memory (Eichenbaum (2017a)) while  
22 the mPFC is believed to create the stimulus-context associations that support decision making (Euston et al.  
23 (2012)) and to support working memory via sustained attention on relevant sensory representations (Postle  
24 (2006), Lara and Wallis (2015)). Although the interaction between those two areas are known to support  
25 different cognitive processes (Battaglia et al. (2011), Eichenbaum (2017b), Shin and Jadhav (2016), Preston  
26 and Eichenbaum (2013)), it is still unknown how the interplay between the mPFC and hippocampus can lead  
27 to the formation of internal representations linking events separated in time.

28 The mPFC neuronal activity can be modulated by different stimuli and reward (Starkweather et al. (2018),  
29 Otis et al. (2017)). Beyond responding to positive outcomes (Euston et al. (2012), Burton et al. (2009),  
30 Gruber et al. (2010), Pratt and Mizumori (2001)), the mPFC can also encode expectancy of both positive and  
31 negative outcomes (Baeg (2001), Gilmartin and McEchron (2005)), and reward absence (Quilodran et al. (2008)).  
32 Moreover, mPFC is implicated in acquisition of context-dependent rules (Miller and Cohen (2001), Miller (2000))  
33 and required for the maintenance of stimulus representations during delays in working memory tasks (Goldman-  
34 Rakic (1995), Funahashi et al. (1993)), even though this representation might be stored elsewhere (Lara and  
35 Wallis (2015), Postle (2006)). The mPFC was shown to encode long memory traces of past decisions (Murakami  
36 et al. (2017)) and rewards (Bernacchia et al. (2011)) and it is required to implement trial-history biases in  
37 decision-making tasks (Murakami et al. (2017)).

38 Similar to the mPFC, the hippocampus is also required in tasks involving delayed decision (Hattori et al.  
39 (2015), McEchron and Disterhoft (1999, 1997)). Beyond its strong link to spatial processing (Moser et al. (2015,  
40 2008)), hippocampal activity also encodes multiple temporal features, possibly bridging task events separated in  
41 time through temporal sequences (Pastalkova et al. (2008a), MacDonald et al. (2011), Naya and Suzuki (2011),  
42 Eichenbaum (2014)). For instance, CA1 inactivation during a trace fear condition task impaired learning by  
43 preventing the temporal binding of the CS and US stimuli in memory (Sellami et al. (2017)). During trace fear  
44 conditioning, a reorganization of CA1 ensemble activity occurred during learning of the conditioned response,  
45 linked to the emergence of sparse CS-selective responses in pyramidal cells (Ahmed et al. (2020)). However,  
46 the circuit mechanisms underlying CA1 network reorganization and the role of the CA1-mPFC coordinated  
47 interaction during learning are unknown.

48 In this work, we aimed at elucidating the neural mechanisms leading to the emergence of a temporal as-  
49 sociation, linking events occurring at different times. To this end, we recorded neurons from the hippocampal  
50 area CA1 and mPFC of mice engaged in an appetitive auditory trace-conditioning task (Klee et al. (2021)), and  
51 examined how learning shaped the relationship between stimulus responses, temporal encoding, and behavior.  
52 We found that both conditioned (CS) and unconditioned stimuli (US) triggered the onset of temporal sequences  
53 in both CA1 and mPFC, which in turn were differentially modulated by learning. Moreover, we found, after

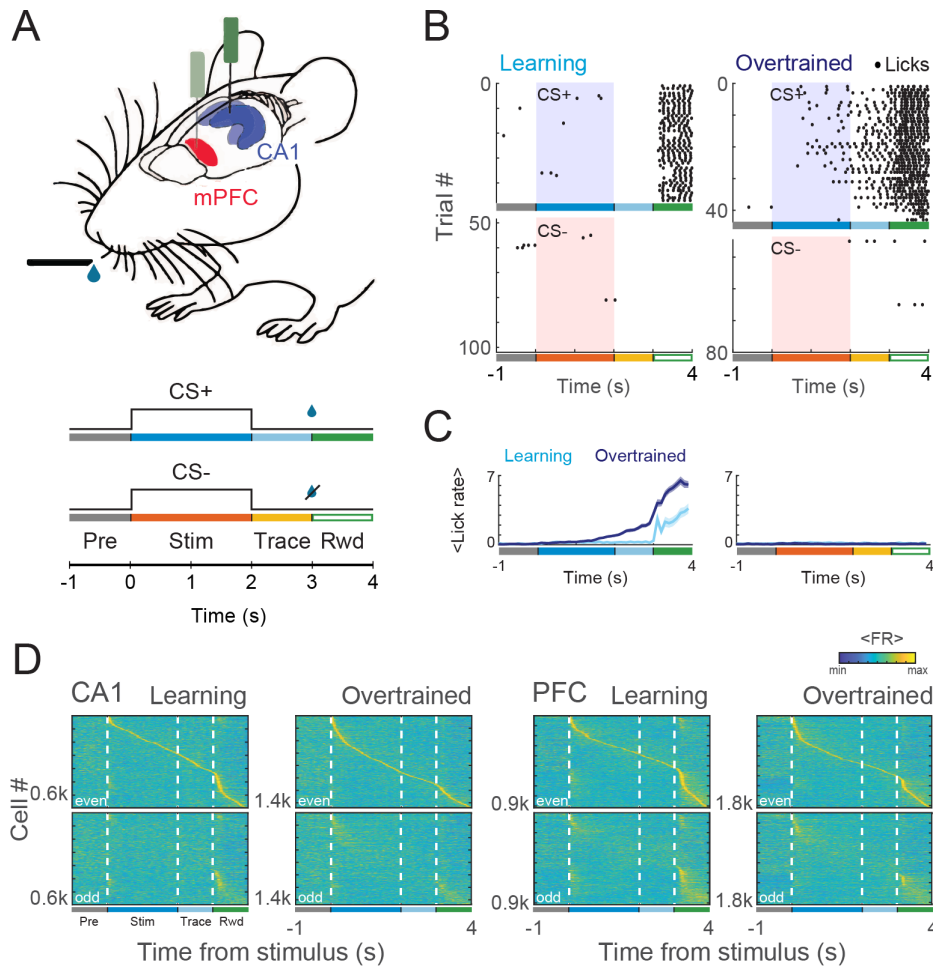

**Figure 1: Behavioral and firing rate profile during a trace conditioning.** **A.** Schematic representation of the task. Head-fixed animals with acute implants on CA1 and mPFC were presented a 2-sec auditory stimulus (either CS+ or CS-). After a 1-sec (trace period) a reward (US) was available on CS+ trials. **B.** Lick response of an example animal in CS+ and CS- trials before and after learning. **C.** Average lick response for CS+ and CS- trials for all animals. Overtrained sessions were identified by the presence of anticipatory licks in CS+, but not in CS- trials. **D.** Average firing rate profile of all recorded cells over the course of a CS+ trial. Peak firing rate time on even trials was used to sort cells on both groups (even and odd). Note the presence of temporally structured firing after CS and US presentation.

54 learning, that unexpected reward delivery evoked an echo of the CS+ temporal sequence in mPFC during the  
 55 US. We uncovered strong and persistent stimulus representation in the mPFC, which started after the stimulus  
 56 onset and persisted until the US, bridging stimulus and reward over the trace periods. Using single-trial decod-  
 57 ing based on hidden Markov models, we found that the reactivation of CS+ coding states in mPFC predicted  
 58 the onset of wrong licks in response to CS-stimuli, leading to error trials. Coordination between CA1 and PFC  
 59 states decreased during CS+ trials, suggesting that CA1 may support internal memory representation during  
 60 the initial stimulus sampling, while mPFC activity is dominated by network states encoding stimulus-reward  
 61 mapping and driving behavior in overtrained animals.

## Results

62 We previously developed an appetitive trace conditioning task (Klee et al, 2021) which trained mice to differ-  
63 entiate between two sound stimuli (conditioned stimulus: CS+ and CS-; Figure 1A). In each CS+ trial, the  
64 2s stimulus was followed by a 1s delay (trace period), and a reward delivered in a water port. The same trial  
65 structure was present in CS- trials, except that there was no reward. In order to investigate the neural dynamics  
66 in CA1 and mPFC during the trace conditioning task, we acutely inserted high-density silicon probes in CA1  
67 and/or mPFC and recorded spiking activity during the task, before and after learning. Crucially, the presence  
68 of a long trace period in this experimental paradigm rules out a simple Hebbian mechanism to link CS and  
69 US neural representations, because the two stimuli occur in different epochs of the trial without any temporal  
70 overlap Raybuck and Lattal (2014). Additionally, this paradigm allowed us to separate representations that  
71 might emerge during the sensory cue, from the internally generated representations that bridge the stimulus to  
72 the behavior during the trace period. Learning criteria was achieved when animals licked in anticipation of US  
73 in CS+ trials, but not in CS- trials (lick rates statistically different between CS+ and CS- trials;  $p < 0.05$ , t-test;  
74 Figure 1A-C).

### Differential encoding of temporal information in CA1 and mPFC ensembles

75 We first investigated whether CA1 and mPFC ensembles encoded the passing of time within the trial by  
76 generating sequential activity that consistently tiled the duration of a trial. To test this, we computed the  
77 average binned firing rate (80 ms sliding window) of the pooled neurons over a subset of the trials (even trials).  
78 The neurons were then sorted according to the time of their peak firing rate. We then applied the same order in  
79 the remaining, odd trials to unveil cells firing in a reliable temporal structure. If neurons generated consistent  
80 temporal sequences, we would expect the same sequential activation to be present both in the odd and in the  
81 even trials. We found a concentration of peak activation around the first 0.5 s after stimulus (CS), which seemed  
82 to be modulated by learning (mainly in CA1; Figure 1D). In addition, we also found a concentration of peaks  
83 after reward onset (US). Interestingly, some cells peaking in the CS had also a peak at the US and vice-versa  
84 (this effect was mainly seen in PFC). Those results unveiled the presence of temporal sequences coordinated by  
85 stimulus (CS+) and reward (US) onset at the population level (Figure 1D, Figure S1).

86 We confirmed these results on a session-by-session basis, using a cross-validated Naive-Bayesian classifier to  
87 discriminate time points within a trial from population activity of each session (Figure 2A). Decoding probability  
88 was then evaluated for different time bins, building a time-decoding matrix with the corresponding testing bin  
89 time in the x-axis and the decoded time on y-axis. If temporal coding was present, we expected a high  
90 classification accuracy on the main diagonal where predicted time (y-axis in Figure 2A) matched real time  
91 (x-axis). The presence of temporal sequences was then assessed by measuring how much decoding probability  
92 successively concentrated in the main diagonal, where decoded time is equal to real sample time.

93 Similar to our previous population analysis, we found temporal sequences associated with CS+ and US  
94 (Figure 2B). This was evident in the mean time-decoding matrices, but also when looking exclusively to the

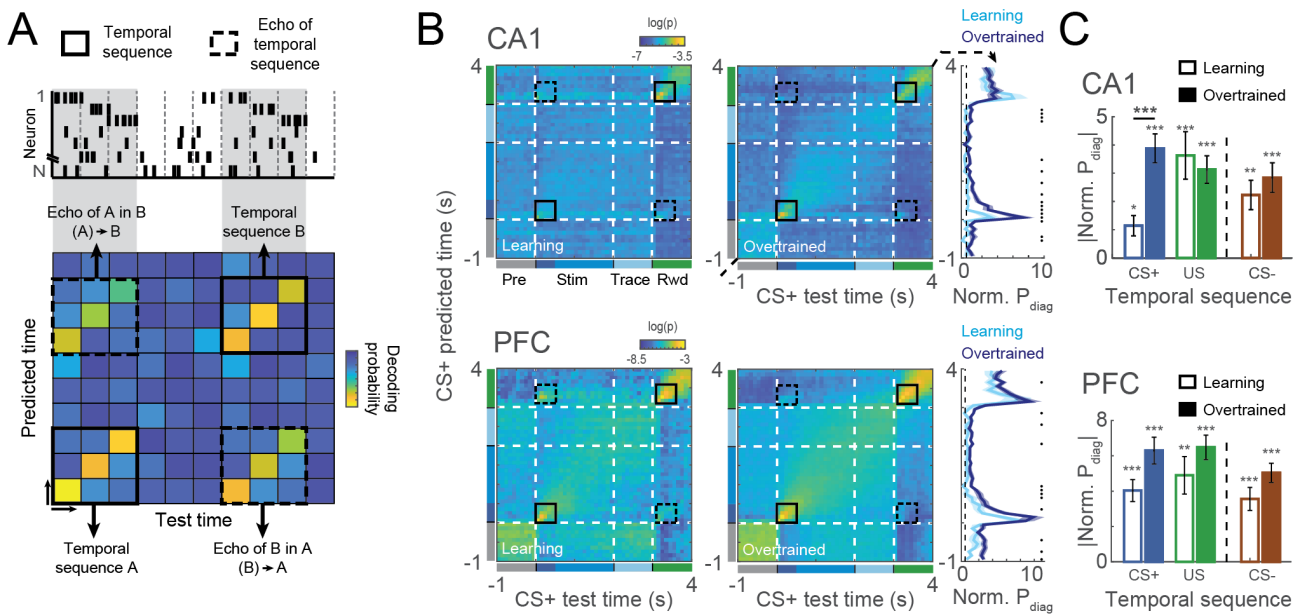

**Figure 2: Emergence of temporal sequences for CS+, CS- and US.** **A.** Schematic representation temporal sequences in the spike activity (top) and how they emerge in the time decoding matrices (bottom). Bayesian decoders were trained to predict the trial time of a given time bin, which was used to build a matrix with decoding probabilities for each time bin over the course of the trial. Temporal sequences were then identified as clusters of high performance in the main diagonal, where real time matches predicted time. Additionally, diagonal stripes of high temporal decoding performance outside the main diagonal revealed the similarity between two temporal sequences, and were defined as the temporal echo of one sequence (actual time) in the other (predicted time). **B.** Mean time decoding matrices for learning and overtrained sessions together with the average normalized probability on the main diagonal (rightmost panel). Decoders were trained and tested using CS+ activity from CA1 (top) and PFC (bottom). Black boxes show the regions in which temporal sequences (solid lines) and temporal echoes (dashed lines) were present. Black dots denote times in which learning and overtrained decoding are different (Wilcoxon ranksum,  $p < 0.05$ ). **C.** Average (normalized) decoding probability around CS+ and US temporal sequences, taken on main diagonal of the contiguous black boxes in B. Normalization was done by z-scoring probability values using the the mean and s.d. from surrogate decoding matrices. CS- sequences were computed similarly to CS+, but from a decoding matrix computed using CS- activity for training and testing (see also Figure S2). We used aligned rank transform to perform a nonparametric two-way ANOVA using recording area and learning condition on each temporal sequence as factors. We found no significant interaction effect for the two factors ( $F(1,107) = 0.51, p = 0.47$ ;  $F(1,107) = 0.74, p = 0.39$  and  $F(1,107) = 0.64, p = 0.43$  for CS+, US and CS-, respectively). Simple main effects analysis revealed that PFC had higher temporal sequences than CA1 ( $F(1,107) = 20.08, p < 0.001$ ;  $F(1,107) = 18.02, p < 0.001$  and  $F(1,107) = 14.04, p < 0.001$  for CS+, US and CS-, respectively). Also, for CS+ temporal sequences, we found an effect on learning condition ( $F(1,107) = 18.08, p < 0.001$ ;  $F(1,107) = 1.30, p = 0.26$  and  $F(1,107) = 3.47, p = 0.07$  for CS+, US and CS-, respectively). Notice the increase in CS+ temporal representation in CA1 after learning. Shaded areas and errorbars denote SEM. \* $p < 0.05$ ; \*\* $p < 0.01$ ; \*\*\* $p < 0.001$ .

95 main diagonal (right-most panel). Interestingly, time-decoding matrices computed using CS- trials also showed  
 96 a strong temporal sequence associated with the stimulus (Figure S2A). To quantify this effect, we computed  
 97 the average of the main diagonal in the temporal sequence window (0-0.5s for CS and 3.1-3.6s for US) (Figure  
 98 2C). All the temporal sequences (CS+, CS- and US) were significantly different compared to a sham temporal  
 99 sequence artificially detected before the stimulus onset ((-1)-(-0.5)s).

100 We then tested whether the strength of temporal encoding differed between areas and whether it was  
 101 modulated by learning. We found a stronger temporal encoding in mPFC compared to CA1 following each  
 102 stimulus (non-parametric two-way anova with aligned rank transform (Wobbrock et al. (2011); main effect  
 103 (mPFC vs. CA1),  $p < 0.001$ ; no interaction effects; see Figure 2C). Moreover, we found stronger CS+ temporal

104 sequence after learning in both areas (main effect (learning vs. overtrained),  $p < 0.001$ ; see Figure 2C). We could  
105 also see reduction on the relative dimensionality of the population activity during the temporal sequences in  
106 CA1 and (after learning) in PFC (Figure S2B). In general, those results suggest that encoding of time is stronger  
107 in PFC than in CA1 and, in particular, during CS+, which is the most task-relevant stimulus. They also imply  
108 a link between temporal sequences and learning (Figure 2C; see also Figure S2).

## Temporal sequences of CS+, CS-, US ‘echo’ each other, in a learning-dependent fashion

109 The time-decoding analysis revealed a surprising ‘echo’ effect, whereby US and CS+ temporal sequences shared  
110 a similar representation of time following each stimulus (high classification accuracy in off-diagonal regions,  
111 Figure 2A-B). We refer to this effect as the temporal echo of one sequence (the one used to test the model) in  
112 another sequence (the predicted sequence).

113 Because (CS+)–evoked temporal sequences in CA1 were stronger after learning sessions, we hypothesized  
114 that temporal echos could be modulated by learning as well. We reasoned that the similarity between US and  
115 CS+ representation could be inferred by how well US sequences would generalize to CS+. To investigate this,  
116 we computed time-decoding matrices focusing on how US temporal sequences are decoded by a model restricted  
117 to the rest of the trial (pre-stimulus, stimulus and trace period; Figure 3A), from CS+ trials.

118 We found that, during learning sessions, the predicted time of the US temporal sequence strongly concen-  
119 trated at the beginning of the stimulus presentation, where CS+ temporal sequences also happened (Figure  
120 3A). This effect was strongly reduced in overtrained sessions in both CA1 and PFC, both in the general US  
121 average decoding performance (Figure 3A; rightmost panel) and in the temporal echo computed as the average  
122 performance on the main diagonal of the echo window (Figure 3B).

123 Because temporal echo strength decreased with learning, we hypothesized that echos could represent error  
124 signals arising during incorrect trials. Since after learning the animal committed less mistakes, that would  
125 explain weaker temporal echoes in overtrained sessions. To investigate this, we separated trials into correct  
126 (i.e., CS+ trials with anticipatory licks during trace or CS- trials with no licks) and incorrect (i.e., CS- trials  
127 with licks during trace period and CS+ trials with no licks). We then computed the time-decoding matrices  
128 (trained on all CS+ trials) for correct and incorrect CS+ test trials (Figure 3C-D). We found that incorrect  
129 CS+ trials showed a stronger US echo (in CS) compared to correct trials. This was true for learning sessions,  
130 in which the temporal echo was evident (Figure 3C,E), but also in overtrained sessions (Figure 3D,E), partially  
131 recovering the effect we found before learning. Temporal echoes were stronger on incorrect trials (two-way  
132 ANOVA with factors outcome and learning condition, main effect (outcome) CA1:  $p < 0.05$ ; PFC:  $p < 0.001$ ) and  
133 during learning sessions (main effect (learning condition) CA1:  $p < 0.05$ ; PFC:  $p < 0.001$ ). Moreover, in PFC  
134 those two factors showed a significant interaction (outcome and learning condition;  $p < 0.05$ ) (Figure 3E).

135 Interestingly, the US echo in the CS+ was stronger in incorrect trials compared to correct ones. Computing  
136 the same analysis using CS- trials (US echo in CS-) showed no difference between correct and incorrect trials

137 S3. Thus, CS and US representations of time are initially similar, but progressively decorrelate with learning.  
138 Because CS+ and US sequences recovered an increased similarity during incorrect trials (i.e., when the animal  
139 didn't expect the reward), we further hypothesized that the temporal sequences found were a general mechanism  
140 evoked by unexpected events. We reasoned that, although CS+ and US could initially be both perceived as  
141 unexpected events, after learning US occurrences would be predictable by CS+, leading to a change of the  
142 US-evoked temporal sequence and a decreases the similarity between the two sequences. To test this hypothesis  
143 we investigate the similarity between CS- temporal sequences and CS+ and US before and after learning.

144 To do so, we first used a Bayesian decoder trained to predict CS- time (as in Figure S2) to decode samples  
145 of CS+ activity. We reasoned that, if the same neural representation of time was shared between the CS+ and  
146 CS- conditions, then a classifier trained to discriminate time in CS+ trials would generalize well when tested  
147 on CS- trials; and vice versa. Alternatively, a failure of the classifiers to generalize between conditions would  
148 suggest the presence of different time encoding schema. This cross-stimulus decoder revealed that CS- and CS+  
149 temporal sequences have a shared temporal representation, with the CS+ temporal sequence being correctly  
150 decoded during CS- in both CA1 and PFC (Figure 4A, see also Figure S4 for CS- sequences during CS+ trials).  
151 In CA1, this shared representation increased with learning, probably reflecting the strongest temporal CS+  
152 representation in that area after learning. Moreover, the CS- temporal sequence also echoed on US temporal  
153 sequence in the test trial (Figure 4B). This effect could also be seen in the analogous case of testing CS- trials  
154 in a model trained with CS+ trials, where the CS- temporal sequence was echoed in the US epoch of the CS+  
155 decoder (Figure S4A). Similarly to CS+, the CS- temporal echo decreased after learning of the task (Figure  
156 S4B). Together those results corroborate the idea of an initial unspecific representation of time evoked by  
157 unexpected events, which acquires stimulus specificity upon learning.

## Learning induces persistent stimulus representations in PFC but not CA1

158 We next examined whether population activity encoded stimulus identity (i.e., CS+ or CS-). We trained an  
159 ensemble of SVM classifiers to discriminate between CS+ and CS- conditions in each bin. For each classifier  
160 trained on a particular time bin, we then predicted the trial identity (CS+ or CS-) of all other bins. We used  
161 different combinations of training and testing time bins to build a temporal generalization matrix (King and  
162 Dehaene (2014); Figure 5A), a framework which allowed us to examine the temporal nature of the stimulus rep-  
163 resentations in CA1 and PFC (Figure 5A). We tested three alternative scenarios: i) A high decoding accuracy  
164 restricted to a tight region around the main diagonal, suggesting a reliable yet time-varying stimulus repre-  
165 sentation (such as stimulus-specific sequential activity); ii) An extended area of high accuracy covering a large  
166 diagonal block, suggesting a persistent and stable stimulus representation; iii) No area of significant decoding  
167 accuracy, suggesting the absence of a reliable stimulus representation (for example, in a scenario of stochastic  
168 reactivation of stimulus-specific patterns at random times in each trial). We found very different encoding  
169 dynamics in CA1 and PFC. In CA1 decoding performance seemed to concentrate near the main diagonal, and  
170 we found a significant increase in decoding performance during trace period only (Figure 5C-D). On the other



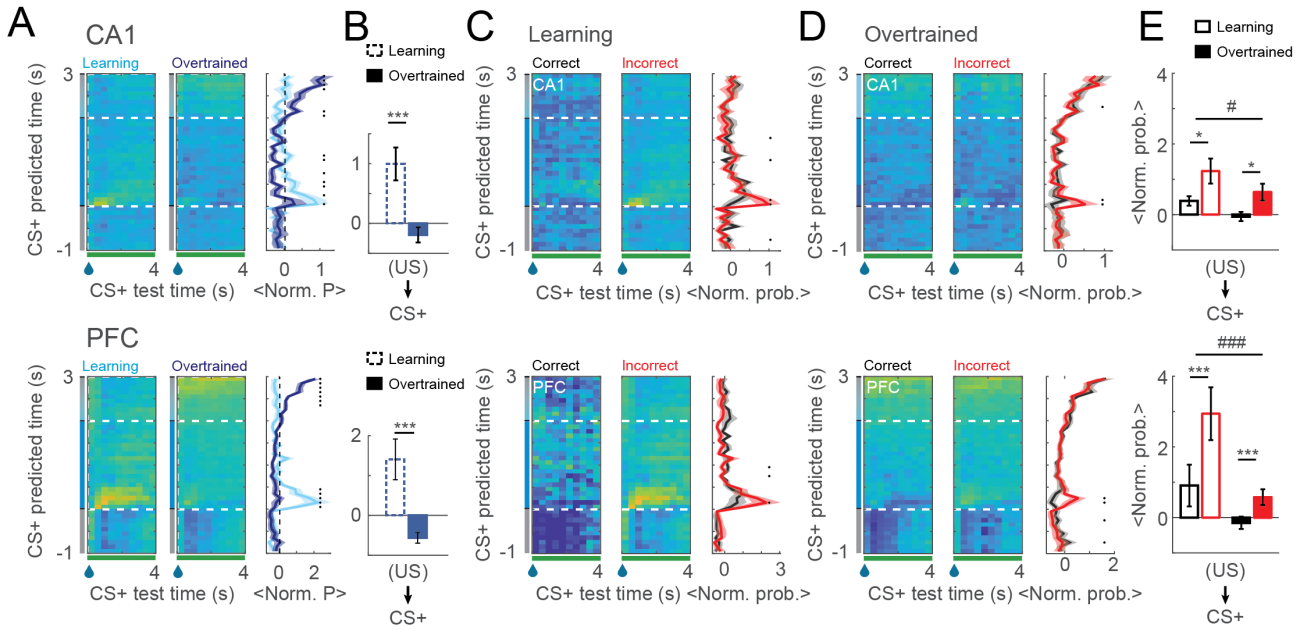

**Figure 3: Similarity between CS+ and US temporal representations is modulated by learning and trial outcome.** **A.** Time decoding matrices trained using CS+ activity before the US, and used to decode US time (left and middle). Average (normalized) probabilities for the US period are shown for learning and overtrained sessions (right). **B.** Mean decoding in the temporal echo window for CA1 and PFC. **C-D.** Time-decoding matrices as in A, but showing the temporal echo in correct and incorrect trials from learning (C) and overtrained (D) sessions. **E.** Average performance on the temporal echo window (main diagonal) for CA1 (top) and PFC (bottom). We used aligned rank transform to perform a nonparametric two-way ANOVA using trial outcome (i.e., correct vs. incorrect) and learning condition as factors for each area independently. We found no significant interaction effect for the two factors in CA1 and ( $F(1,117)=0.08, p=0.78$ ) and significant effect on learning condition ( $F(1,117)=6.59; p<0.05$ ) and trial outcome independently ( $F(1,117)=5.05; p<0.05$ ). In PFC both trial outcome ( $F(1,92)=12.05, p<0.001$ ) and learning ( $F(1,92)=18.13, p<0.001$ ) showed significant main effects, but there was also a significant interaction between factors ( $F(1,92)=4.93, p<0.05$ ). Shaded areas and errorbars denote SEM. \*/#:  $p<0.05$ ; \*\*\*/###:  $p<0.001$ .

171 hand, a strong and persistent stimulus representation encompassing both stimulus and trace periods emerged  
 172 in PFC after learning (Figure 5C-D). Both effects could also be seen by looking at stimulus representation at  
 173 specific time points (i.e., rows of the decoding matrices in Figure 5C), as summarized in Figure 5E. Stimulus  
 174 encoding increased strongly with learning in PFC during both the stimulus and trace periods. In CA1, stimulus  
 175 encoding was weaker and mildly improved with learning only during the trace period.

### Transient co-activation of neural assemblies underlies stimulus-coding neural representations

176 The classification analysis discussed above showed that CA1 ensembles do not encode stimulus information in a  
 177 time-ordered representation consistent across trials. Alternatively, stimulus-specific assemblies could stochasti-  
 178 cally reactivate for brief intervals, at random times in different trials. To investigate the presence of transient yet  
 179 stochastic reactivation of neural assemblies, we fit a hidden Markov model to each recording session, separately  
 180 in CA1 and mPFC. The HMM is a probabilistic generative model for neural population data, capturing both  
 181 the network organization in a small set of stereotyped neural states, each one representing epochs where neural  
 182 populations fire at an approximately constant rate; and also the dynamical transitions between these states

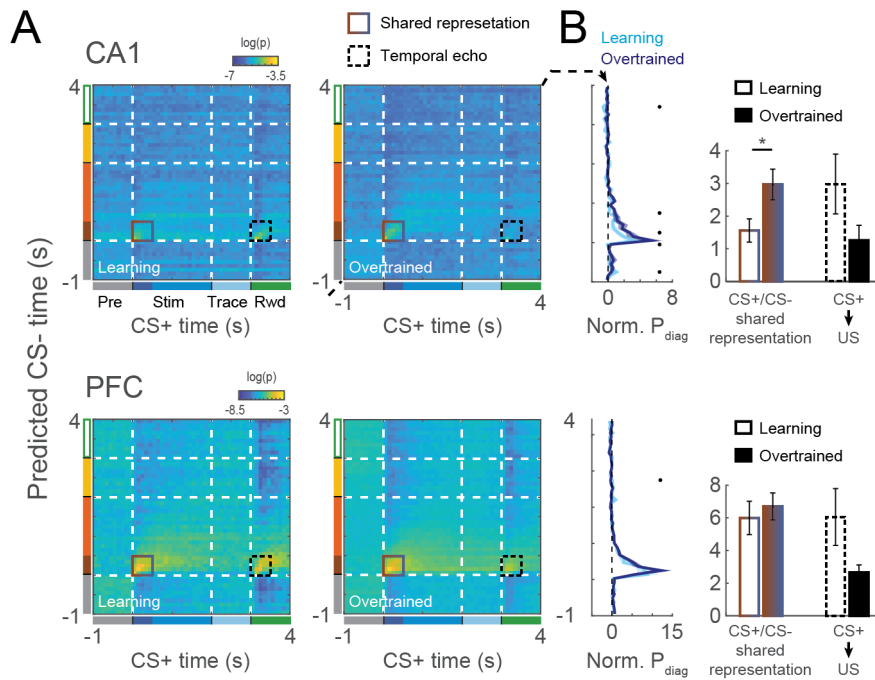

Figure 4: **CS- have a shared temporal representation with CS+.** **A.** Time-decoding matrices trained using CS- activity and used to decode time in CS+ trials in CA1 (top) and PFC (bottom). Solid boxes show areas in which a shared temporal representations can be seen. Dashed boxes show US temporal echoes on CS-. **B.** Normalized decoding performance in the main diagonal (left) and average decoding over the shared and echoed representations (right) in the matrices in A.

183 forming stochastic sequences. Figure 6A shows an example of neural activity in a CS+ trial in PFC, where  
 184 multiple states were detected. In the following analyses, unless stated otherwise, we used the most-likely state  
 185 to define state activation.

186 A pseudo-colored rastergram showing state activation in CA1 and PFC for trials in a representative session  
 187 can be seen in Figure 6B. In general, CA1 showed a higher number of states than PFC in both learning  
 188 and overtrained sessions (Figure S5B; model selection for the number of states was obtained via the Bayesian  
 189 information criterion (BIC), Supp. Figure S5A; Recanatesi et al. (2022)) and state duration in CA1 was also  
 190 shorter than in PFC (Figure S5C). Moreover, the probability of most-likely state in CA1 was generally lower,  
 191 peaking around 0.65, than in PFC, which had usually values above 0.8 (Figure S5D,F). This suggests that  
 192 PFC state activation is univocal, with no competition across states, while in CA1 states may be coactivated  
 193 or partially overlapping with other states. Following our previous results, we hypothesised that HMM states  
 194 would also be able to capture the presence of the temporal sequences in the form of sequential state activation.  
 195 Notice that a sequential state activation can actually be seen in the example sessions in Figure 6C, in the blue,  
 196 orange and green states. In order to measure that, we used a sliding window to compute the (state) sequence  
 197 index - an unbiased mutual information between the state activation and their ranks across multiple trials (see  
 198 Materials and Methods and Figure S6). We found a strong increase in the sequence index near the stimulus  
 199 onset for PFC and a smaller peak in CA1, consistent with the temporal sequences found using the time-decoding  
 200 matrices (Figure 6D). Moreover, the sequential structure was consistent across learning and overtrained periods,  
 201 suggesting that the encoding of temporal information is independent of learning.

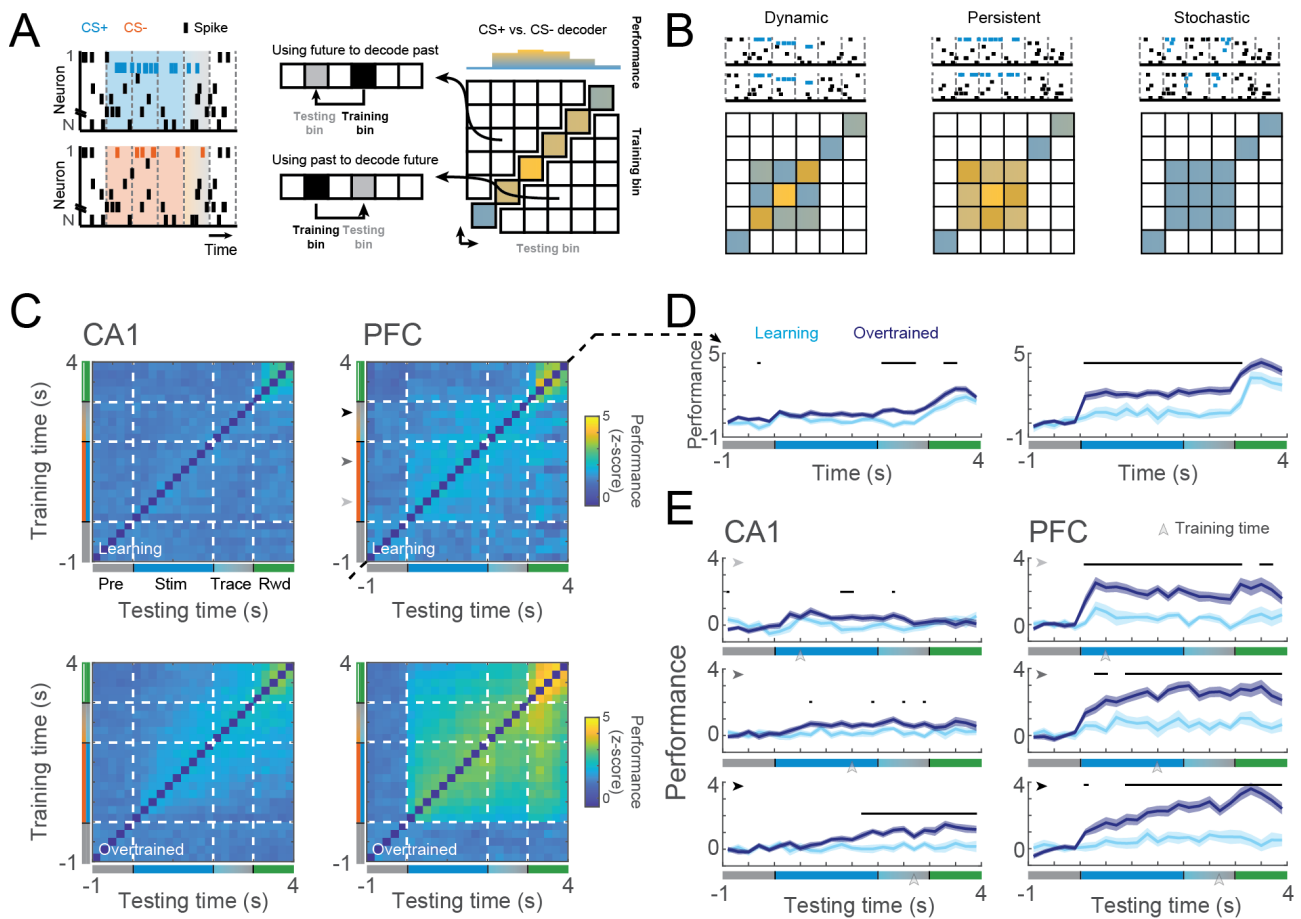

**Figure 5: Different trial type decoding dynamics in CA1 and PFC** **A.** Schematic representation of trial type decoding matrices. The activity in each time bin was used to train a CS+/CS- SVM classifier. Test bins were evaluated on decoders based on past, current and future time bins, enabling an evaluation of stability of neural representations over time. **B.** Possible modes of neural representations. Trial decoding matrix can reveal whether the nature of the stimulus representation is time-varying (left), persistent (middle) or undetectable (right). In case of a time-varying representation, population activity would encode stimulus identity in a stereotypical trajectory, with non-generalizable decoders over the trial time. Alternatively, in case of a persistent representations, population activity would reach a fixed stable attractor, with decoders being generalized over the trial time. At last, the stimulus decoding matrix could detect no reliable stimulus representation. **C.** Mean CS decoding matrices for learning (top) and overtrained (bottom) sessions of CA1 and PFC. **D.** Average performance of the main diagonal in the matrices in C. Black dots represent bins in which learning and overtrained performance are significantly different ( $p < 0.05$ ; Wilcoxon ranksum test). **E.** Rows of the CS decoding matrices in C. Black arrows denote the time bin used to train the models (y-axis in C). Notice the stability of PFC stimulus representation over the stimulus and trace period while CA1 representation mildly strengthens during trace. Black traces denote different learning and overtrained performances ( $p < 0.05$ ; Wilcoxon ranksum test).

## Transient co-activation of neural assemblies underlies stimulus-coding neural representations

202 To investigate whether HMM states encoded stimulus identity, we used the distribution of state activation  
 203 during stimulus and trace periods in CS+ or CS- trials (Figure 6C). States that were significantly more active  
 204 during CS+ or CS- were defined as 'CS+ coding states' or 'CS- coding states', respectively (Mazzucato et al.  
 205 (2019)). Before our learning criteria, only a small number of coding states were detected both PFC and CA1  
 206 (Figure 6E). Both areas showed a significant increase in the number of coding states after learning, with a larger  
 207 fraction of coding states in PFC compared to CA1, despite the larger number of HMM states detected in CA1

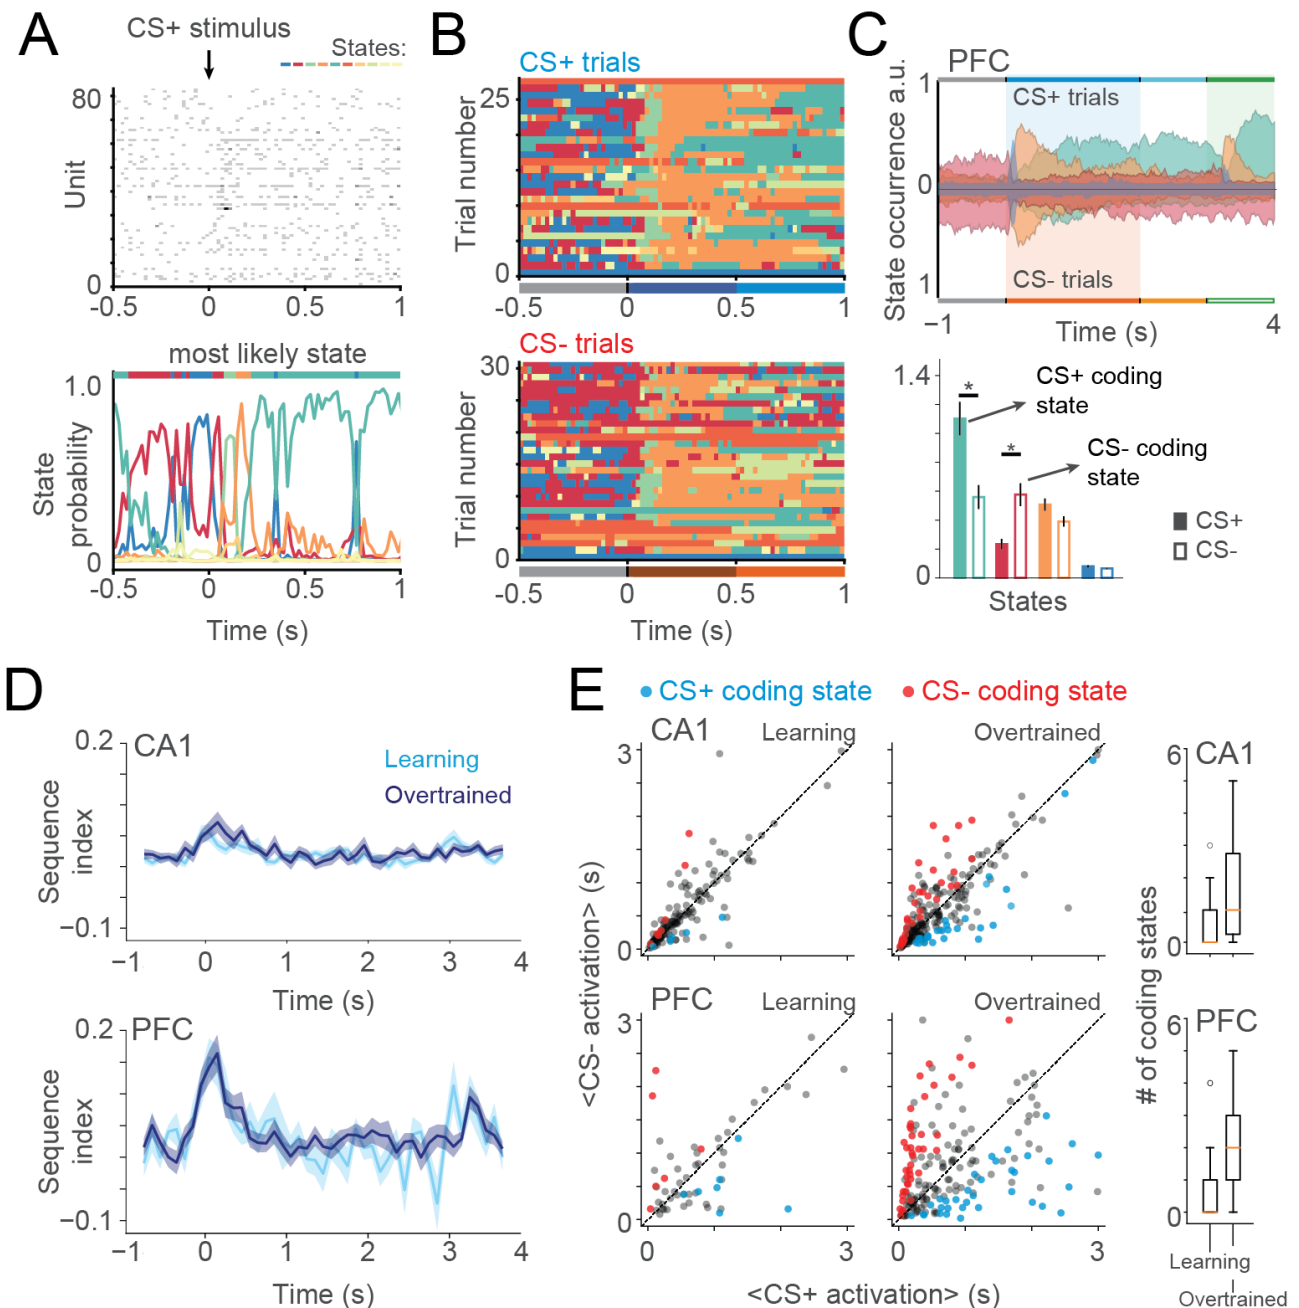

**Figure 6: Transient co-activation of neural assemblies captured by hidden Markov models.** **A.** Neural activity during a CS+ trial (top) and its respective hidden states probabilities (bottom) during an overtrained example session in PFC. Color-coded curves represent posterior probabilities of each state. At each time point, the most likely state (colored bar on top) was defined as the active state. HMM states were computed separately for CA1 and PFC. **B.** Example plot of state activation in PFC over the beginning of different CS+ (top) and CS- (bottom) trials for the session in A. Notice the visible sequential activation of states after stimulus onset. **C.** (Top) Probability of state activation over CS+ (upper quadrant) and CS- (lower quadrant) trials for some states of the session in B. (Bottom) Bar plots show the average state activation probability during stimulus and trace period. Note that some states are significantly more active CS+ (CS+ coding states) or CS- (CS- coding states). Errorbars denote SEM (\* $p < 0.05$ ; Wilcoxon signed rank test). **D.** State sequence index computed in a 0.5 s sliding window for learning and overtrained sessions in both areas. Notice that sequence index peaked after stimulus onset, showing that HMM states could also capture the temporal sequences dynamics. For this analysis both CS+ and CS- trials were used. **E.** Average CS+ and CS- activation during trace and stimulus period for every state in learning (left) and overtrained (middle) sessions, together with boxplots showing the distribution of coding states per session (right). Color denotes CS+ (blue) and CS- (red) coding states. Note the stronger increase in the number of coding states for PFC.

208 overall and consistent with the larger stimulus-decoding accuracy found in PFC compared to CA1.

209 We then focused on coding states in overtrained sessions, and looked at which moments those states were  
210 most active along the trial (Figure 7A). We found that CS+ coding states increased their activation during CS+  
211 trials, while keeping similar levels of activation in CS- trials in comparison to pre-stimulus period. Notably, the  
212 average CA1 activation of CS+ coding states in CS+ trials peaked in the middle of stimulus period, while in  
213 PFC those coding states had a sharp and steady increase in their activation levels. For CS- coding states the  
214 greatest change was also present during CS+ trials, in which the coding states were strongly inhibited, following  
215 a similar temporal dynamic in CA1 and PFC as in the CS+ coding states. Altogether, those results suggest  
216 that both CS+ and CS- coding states are originated by changes in state activation during CS+ trials. In order  
217 words, CS- coding states are indefinitely active, and inhibited during CS+ stimulus instead of being more active  
218 during CS-. This suggests that encoding stimulus identity by coding states in PFC is biased towards the relevant  
219 stimulus of the task (i.e., CS+). These results explain the single-trial origin of the poor decoding in CA1 and  
220 the strong and stable decoding in PFC discussed above. The fact that we can find coding states in CA1 and  
221 that they do not follow a stable temporal pattern of activation corroborate the hypothesis of stochastic coding  
222 states (i.e., not time-locked with the stimulus) dominating CA1 activity.

223 We next hypothesized that coding states in both areas could have an increased co-activation pattern. We  
224 then computed the cross-correlation between pairs of CS coding states simultaneously recorded in CA1 and PFC  
225 during stimulus and trace period (Figure 7B). We found that CS+ coding states in CA1 and PFC tended to  
226 co-activate, with PFC states preceding CA1 ones. Interestingly, when looking at the co-activation of CS- coding  
227 states in the same period we could see no area leading the state activation (Supp. Figure S8B). Despite those  
228 results suggesting some interplay between CS+ coding states in both areas, we found that the peak correlation  
229 between coding states was not higher than between non-coding states (Supp. Figure S8C). Moreover, the mutual  
230 information between state activation in CA1 and PFC actually decreased during the late stimulus and trace  
231 periods of CS+ trials (Supp. Figure S5G). Together, those results suggest that CS+ coding states in PFC  
232 might have a leading role into representing the trial type, but there is no task-related increase in CA1-PFC  
233 communication.

## Onset of stimulus-coding neural states predicts behavioral performance

234 We next investigated whether one could reliably predict the animal's behavior in single trials from the specific  
235 onset of PFC stimulus-coding states. We hypothesized that the activation of a CS+ neural representation could  
236 lead to the behavioral expression of the conditioned response. Specifically, we examined whether the onset of a  
237 CS+ coding state in a correct CS+ trial preceded the onset of the first lick and likewise, whether the offset of  
238 CS- coding states preceded lick onset (Figure 7E). In order to do that, we computed the (z-scored) coding-state  
239 probability centered at the time of the first lick of the trial. Significance was accessed by comparing state  
240 probability to the average baseline probability (computed in a 0.5 s window from -1 s before the lick onset). To  
241 rule out effects of stimulus onset, only first licks happening 1 s after stimulus were considered. We found that

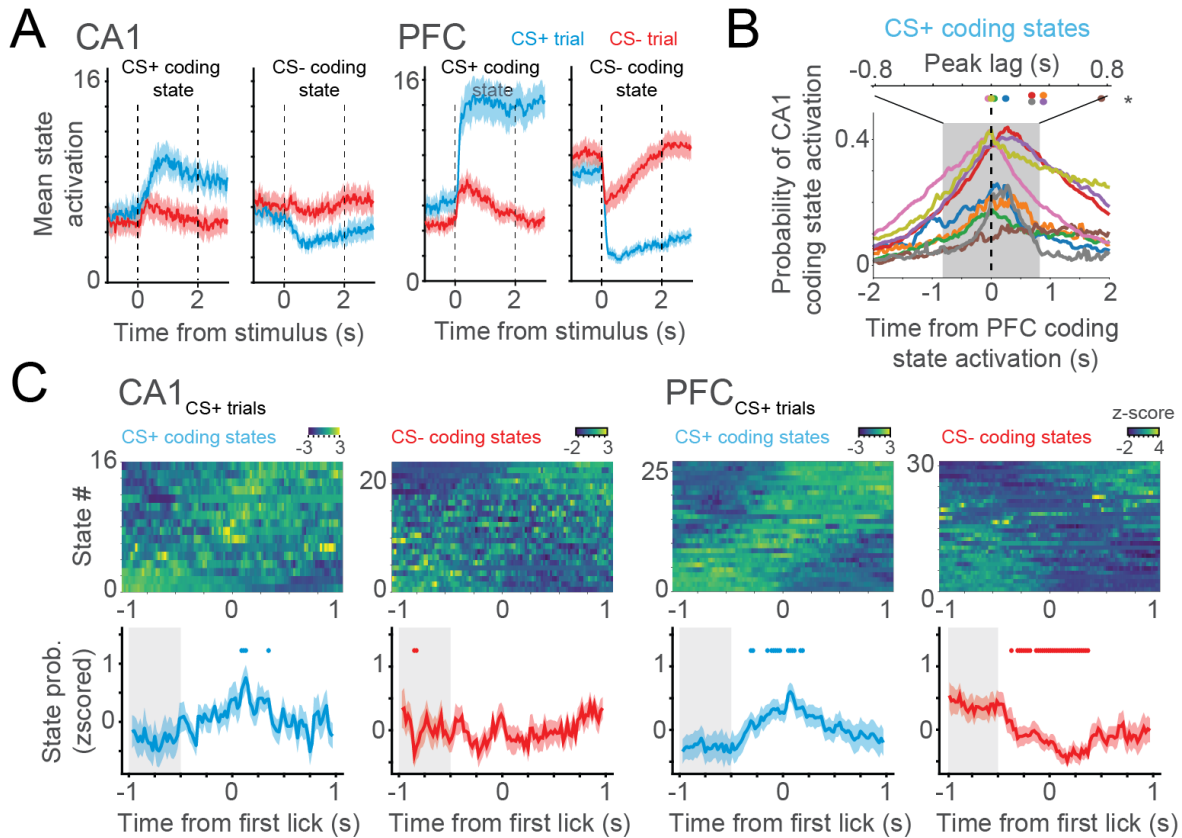

**Figure 7: Emergence of CS coding states after learning.** **A.** Average of CS+ and CS- coding states activation in both areas. The activation of coding states are shown during CS+ and CS- trials. Note that in both areas CS- coding states show increased activation during pre-stimulus period, being inactive during stimulus in CS+ trials. On the other hand CS+ states have low activation during pre-stimulus period, peaking after the stimulus presentation. **B.** Cross-correlation between CA1 and PFC (CS+) coding states activation in sessions with simultaneous recordings. Most of CA1 coding states peaked their activity after PFC coding states activation. **C.** Coding state's activation during overtrained sessions, centered on the first lick of (CS+) trials. State activation is shown for both CS+ and CS- coding states of CA1 (left) and PFC (right). Notice that activation of CS+ coding states precedes the first lick of the trial in PFC. Similarly, CS- coding states are inhibited before the lick onset. This can not be explained by proximity with stimulus onset (see methods). Dots represent probability of state activation significantly different than the average probability in the shaded rectangle ( $p < 0.05$ ; Wilcoxon sign-rank test). Shaded areas denote SEM.

242 specifically in PFC an increase in probability of CS+ coding states consistently preceded lick onset in CS+ trials.  
 243 Analogously, CS- coding state probability consistently decreased before lick onset. In CA1, CS+ coding states  
 244 sharply peaked their probability after the lick onset, which is in accordance to the posterior activation of CA1  
 245 CS+ coding states shown in Figure 7D. Crucially, PFC coding states showed similar dynamics in (erroneous)  
 246 CS- trials (Supp. Figure S8A), with CS+ coding states with a tendency to peak before lick onset, and CS- coding  
 247 states significantly inactivating before the first lick. Notably, this effect could not be explained by delays in lick  
 248 onset detection, since the minimum inter-lick interval happened on a shorter scale (Supp. Figure S7E). We thus  
 249 concluded that the transient activation of stimulus-specific neural assemblies in PFC predicts the behavioral  
 250 expression of the conditioned response in single trials.

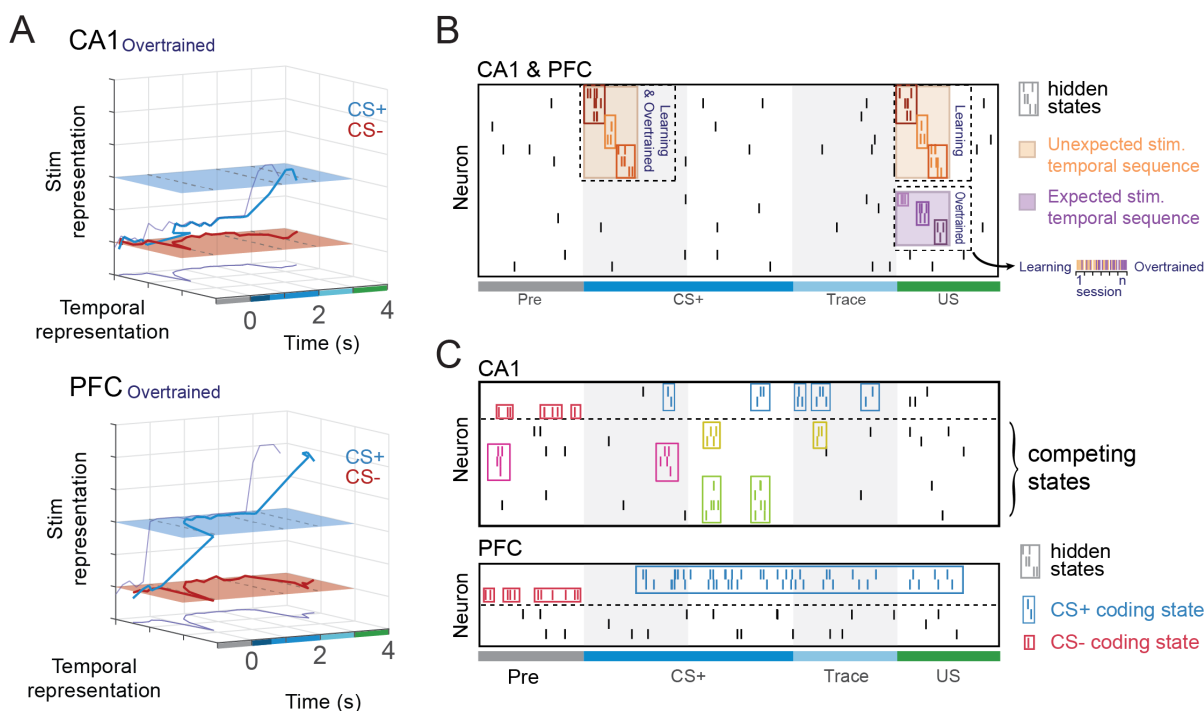

**Figure 8: Schematic representation of temporal and stimulus coding in CA1 and PFC** **A.** Joint temporal dynamics of time and stimulus decoding in overtrained sessions. In CA1 overtrained sessions the stimulus representation of CS+ and CS- lie most of the time in the same plane, starting to increase during trace, and peaking at reward consumption, where CS+ and CS- are differentiable. In contrast, PFC stimulus representation of CS+ differentiates from baseline and CS- representation right after stimulus onset. This effect was also accompanied by a peak on temporal representation, present after CS+ and CS- onset on both areas. The temporal representation also peaked after US onset. **B.** Learning dynamics of temporal sequences and hidden states in both CA1 and PFC. Activation of hidden states captured by HMMs are shown in the small colored boxes. Unexpected stimulus triggers the onset of a generic temporal sequence that can be captured by the states (orange boxes). After learning, the triggered sequence of an expected event (US) changes, disentangling from the unexpected sequence (purple box). Note that, even after learning, error trials (when the US is again unexpected) can recover the activation of unexpected temporal sequences (horizontal colorbar). **C.** Coding state dynamics in CA1 (top) and PFC (bottom). CS+ coding states (blue) in both areas are mostly active during CS+ stimulus presentation, while CS- coding states (red) are indiscriminately active, but inhibited during CS+. In CA1, coding states compete with other states in a way that probability of the most likely state is generally low. On the other hand, there was almost no competition among PFC states. Moreover, decoding performance was strong and generalizable in PFC, suggesting persistent activation of CS+ coding states. In contrast, the milder, time-specific decoding performance in CA1 can be explained by a transient and stochastic activation of coding states, that competed with other states.

## Discussion

251 In this work we elucidated how the dynamics of stimulus and temporal coding in CA1 and PFC are shaped by  
252 learning during an auditory trace conditioning task. Those results are summarized in Figure 8. We found that  
253 both areas encode time via temporal sequences, evoked by stimulus and reward delivery. Interestingly, we found  
254 evidence that stimulus and reward sequences may represent surprise signals, whose representations are similar  
255 in naive animals, and progressively acquire specificity during the course of learning. We found that learning  
256 induces the emergence of a persistent and stable stimulus representation after learning in mPFC, bridging the  
257 gap from stimulus and to reward across the trace period. Looking for stimulus representation on neural states  
258 in single-trials confirmed most of our previous results and further showed that transient activation of stimulus-  
259 coding states in mPFC reliably predicted the onset of the first lick response, providing a link between neural  
260 coding and behavior.

### 261 **Time encoding and surprise signals.**

262 Since time is an important component of declarative memory, and given the role of the hippocampus in this  
263 type of memory, it's not surprising to find some form of temporal coding in this area. In fact, hippocampal  
264 neurons can have timely coordinated spikes in the form of phase precessing place cells and time cells (Eichenbaum  
265 (2014), O'Keefe and Recce (1993)). The increase in temporal decoding we found in CA1 upon learning indicates  
266 that the learning process sculpts the transient response to the CS in a behavior-dependent way, making it more  
267 temporally unique, and longer-lasting (Figure 2). It has been shown that the hippocampus (Solomon et al.  
268 (1986), Bangasser et al. (2006)), and specifically CA1 (Kesner et al. (2005)), is needed to create the CS-US  
269 associations in trace conditioning tasks. In accordance with this, previous works suggest that time cells may  
270 bridge stimulus representation during the trace period (Pastalkova et al. (2008b), MacDonald et al. (2011, 2013),  
271 Kitamura et al. (2015), Sellami et al. (2017)). Although we found temporal representations of the stimulus,  
272 differently from those other works, they faded after the first 0.5 s of stimulus presentation (Figure 8A). This  
273 is similar to other CA1 studies showing no time encoding in calcium traces bridging CS and US during trace  
274 fear conditioning (Ahmed et al. (2020)). In our case, our shorter time-scale analyses allowed us to extend those  
275 findings and find the fast onset and offset of temporal sequences. This might indicate a lower hippocampal load  
276 in this particular task and an CA1-independent maintenance of stimulus representation during the trace period,  
277 as manifested in mPFC.

278 Interestingly, the increase in time encoding with learning was seen specifically after CS+ presentation -  
279 the relevant stimulus of the task - and not after CS- or US (which also presented high values of temporal  
280 decoding, but no changes after learning) (Figure 2C; see also Figure S2). It has been previously shown that  
281 CA1 is important to activate cortical memory representations during memory retrieval (Tanaka et al. (2014)).  
282 It might be that the emergence of a stronger temporal sequences is the mechanism used to process the sensory  
283 information arriving in CA1 from the entorhinal cortex and propagate them to the PFC, where the stimulus-  
284 context associations are held (Euston et al. (2012)).

285 Moreover, before learning CS temporal sequences seemed to be echoed during the US presentation indicating



286 that initially the same temporal pattern was elicited after all the three events (CS+, CS- and US) (Figure 3).  
287 After learning, CS and US similarity drastically decreased in both areas, except during putative incorrect trials  
288 where their pre-learning similarity was partially recovered (Figure 3). This suggests that, in error trials where  
289 the CS+ stimulus identity was likely not encoded and thus the animal did not expect a reward, US-evoked  
290 sequences may encode a surprise signal, more similar to the CS-evoked sequence, as it occurred before learning.  
291 Additionally, this effect seems to be supported by changes in US temporal sequence, while CS+ and CS- shared  
292 representation increases with learning (Figure 4).

293 Together those results suggest a common temporal component triggered by surprise. For example, it might  
294 be that initially unexpected events (CS or US) evoked a partially overlapping temporal sequence, whose shared  
295 element represents a 'surprise' signal. After learning, the surprise element wanes from the US since it then  
296 becomes expected (putative correct trials), leading to the emergence of stimulus-specific responses and enabling  
297 a decorrelation between CS+ and CS- (Figure 8B) and between those and the US. It is worth to note that,  
298 despite the difference between correct and incorrect trials in US echo in CS+, there was no such difference for  
299 the US echo in CS- (Figure S3). This suggests that US temporal sequence are differently captured by CS+ and  
300 CS- decoders, and there might be an additional component beyond 'surprise' playing a role in the similarity  
301 between CS+ and US.

#### 302 **Stimulus coding via mPFC persistent activity.**

303 Even though temporal sequences encoding the outcome signal of the task (i.e., the presence or not of the  
304 US) are present in both CA1 and PFC at the end of the trial, those two areas show different stimulus encoding  
305 profiles. While in overtrained animals CA1 decoders only had a mild increase in performance during trace  
306 period, mPFC showed a strong and stable stimulus decoding since CS presentation (Figure 5 and 8A). Thus,  
307 beyond the outcome of the task, mPFC neurons also contained information about the stimulus, even in its  
308 absence, which is in accordance to previous works (Asaad et al. (2017)) and further support the idea that  
309 mPFC holds the stimulus-action maps.

310 mPFC stimulus representation could be generalized from stimulus to trace period, suggesting the neuronal  
311 dynamic encoding the stimulus in this area reach a stable attractor state. On the other hand, CA1 decoders  
312 could not be well-generalized for different time periods. Could the poor decoding performance in CA1 be  
313 explained by fast stimulus-specific patterns reactivated stochastically at random times (i.e., not time-locked  
314 with the stimulus)? A single-trial pattern analysis based on hidden Markov models managed to reveal stimulus-  
315 coding states in both CA1 and PFC, giving support to the hypothesis of stochastic reactivations in CA1 (7).  
316 Moreover, it might be that in mPFC assemblies compete with each other in a winner-takes-all dynamic, with the  
317 strongest assembly dominating the state of the network, while in CA1 there are different independent patterns  
318 happening concomitantly, making it hard to identify independent states (Figure 8C). This idea is supported by  
319 the lower and higher HMM posterior probabilities found in CA1 and PFC, respectively, (Figure S7D and F),  
320 and corroborates previous works showing neuronal representations encoding different context in mPFC are well  
321 separated while highly overlapping in CA1 (Hyman et al. (2012), Leutgeb et al. (2004)), and previous findings  
322 showing very sparse stimulus selectivity in CA1 (Ahmed et al. (2020)).

323 CA1 and PFC showed the presence of both CS+ and CS- coding states after learning (Figure 7B). Interest-  
324 ingly, we found that CS- coding states were unspecific to the stimulus period, being active during pre-stimulus  
325 period as well (Figure 7C). On the other hand, the occurrence of CS+ coding states was restricted to the CS+  
326 stimulus epoch. In either case (for both CS+ and CS- coding states) coding properties arise due to a higher  
327 state modulation (activation or inhibition) in CS+ trials, the relevant stimulus for US prediction. Moreover,  
328 for PFC the activation of a CS+ coding state reliably preceded the upcoming first lick of the trial, thus ruling  
329 out that it is driven by backdrop of movements reflected in lick modulated neurons as previously reported in  
330 mPFC (Figure 7 C; see also the inter-lick interval in Figure S7E). Crucially, we found that the onset/offset of  
331 PFC coding states in single trials reliably predicted upcoming erroneous licks in CS- error trials (Supp. Figure  
332 S8). This suggests the presence of a causal relationship between transient activation of stimulus representations  
333 in mPFC and an animal decision to lick.

### 334 CA1-PFC coordination.

335 We did not find evidence for general coordination between PFC and CA1 states. The peak cross-correlation  
336 values of CS+ coding states were not significantly different than for CS- coding states and even non-coding states  
337 (Supp. Figure S8C), reinforcing the idea that there is no task-dependent increase in CA1-PFC coordination.  
338 In addition to that, there was no increase in the mutual information between CA1 and PFC states over the  
339 task (Supp. Figure S5G). It seems that the presence of coordinated activity between those two areas may vary  
340 according to the type and period of the task (e.g., sleep, sharp-wave ripples, sensory encoding), which would  
341 explain previous work showing both dependent Jadhav et al. (2016), Peyrache et al. (2009), Shin et al. (2019)  
342 and independent (Kaefer et al. (2020), Klee et al. (2021)) co-activation of neuronal patterns in those areas. In  
343 our case, any relevant interplay between those two areas during the late stimulus or trace period could not be  
344 captured by HMM states. However, this is also consistent with a scenario where CA1 encodes representations  
345 of multiple task-variables in parallel or in a temporally continuous rather than discrete way. An HMM analysis  
346 would likely fail in these scenarios, and alternative methods such as factor analysis (Yu et al. (2008)) or matrix  
347 factorization (Mackevicius et al. (2019)) might help overcome these issues.

348 Despite the lack of coordination between states in the two areas, the cross-correlation between coding states  
349 in both areas showed that PFC leads CA1 in the activation of CS+ coding states, showing the importance of  
350 our single trial analysis with the HMMs. In fact, this late activation of CA1 (CS+) coding states could also be  
351 seen when investigating states activity around the first lick of the trial. For CA1, CS+ coding states activation  
352 peaked later, after the first lick of the trial. This raises the possibility that, while CS+ coding states in PFC  
353 are involved with the actual decision to lick, in CA1 they reflect the sensory signal arising from the entorhinal  
354 cortex after the licking behaviour.

355 In summary, our findings unveiled rich and complex dynamics in CA1 and mPFC during an auditory trace  
356 conditioning, opening new interesting questions. Our results suggests that in our trace conditioning task CA1-  
357 mPFC interplay might happen mostly following the CS presentation, when time encoding is higher in both  
358 areas (Figure 8A,B). After learning, strong, sustained and stimulus-specific representations emerged in mPFC,  
359 bridging across the trace period, with neural states predicting the animal behavior in single trials (Figure 8C).

360 Because those temporal representations also encoded the outcome of the task, the emergence of stronger and  
361 more specific temporal sequences in CA1 might support stimulus encoding and help to organize the following  
362 stable memory representation in PFC.

## Materials and Methods

### Animals

363 In this study we used a total of 17 male C57Bl/6 mice. From this total, seven animals were used for (acute)  
364 silicon probe recordings in the dorsal hippocampus, six for silicon probe recordings in the medial prefrontal  
365 cortex, and four additional animals were used for simultaneous silicon probe recordings. Animals were kept  
366 in a reversed light/dark cycle, and had access to food ad libitum until two days after the surgery, when food  
367 restriction was introduced (90% of initial body weight). A detailed description of experimental procedures can  
368 be found in Klee et al. (2021). This study was approved by the Dutch Central Commissie Dierproeven (CCD)  
369 and conducted in accordance with the Experiments on Animals Act (Dutch law) and the European Directive  
370 2010/63/EU on animal research.

### Surgical Procedures, behavioral training and data collection

371 Animals were kept under isoflurane (1-2%) anesthesia and placed in the stereotaxic frame. Carprofen (5 mg/kg)  
372 and lidocaine were subcutaneously injected in the area of the scalp before skull exposure. A custom-made circular  
373 head-fixation plate was placed on the skull and fixated with dental cement (Super-Bond C&B). A skull screw  
374 was placed over the cerebellum to serve as ground and reference for the later electrophysiological recordings.  
375 For animals used in CA1 recordings, a craniotomy was performed at the left hippocampus (-2.3 mm posterior  
376 and +1.5 lateral to Bregma). For animals used in PFC recordings the craniotomy was done over the left frontal  
377 cortex (+1.78 mm anterior and +0.4 lateral to bregma). A silicon elastomer (Body Double Fast, Smooth-on)  
378 was then used to covered the exposed skull until the first recording. After at least 2 days of recovery from  
379 surgery, animals began habituation to the head-fixed setup which consisted of two rods that could be screwed  
380 to either side of the implanted head-plate. In the head-fixed setup animals could move through a virtual linear  
381 track using a air-supported spherical treadmill. Feedback from treadmill movement was projected in a spherical  
382 screen surround the animal head. A plastic reward port delivering soy-milk was placed 0.5 cm away from the  
383 posterior lip of the animal. Animals underwent at least 6 habituation sessions (3 sessions of 10 min per day)  
384 in which they received about 0.2 ml of soy milk before the beginning of trace electrophysiological recordings.  
385 The appetitive auditory trace conditioning task required the animals to associate a specific sound stimulus (the  
386 positive conditioned stimulus; CS+) to a later reward (unconditioned stimulus; US), in contrast to a second  
387 stimulus not associated with the reward (CS-). In our task, CS+ and CS- stimuli lasted for 2 s, and in the case  
388 of CS+ trials, the stimulus was followed by a silence period of 1 s (trace period) and then US delivery. Trials  
389 were then structured as 1 s of pre-stimulus, 2 s of stimulus, 1 s of trace, and 1 s of reward period. Learning

390 of the task was accessed via anticipatory licking, detected using an infrared sensor beam in front of the reward  
391 spout. Sessions in which the amount of anticipatory licks during the trace period in CS+ trials was significantly  
392 different than in CS- trials (t-test) were classified as overtrained, while the others were classified as learning  
393 sessions. CS+ and CS- trials were presented in a pseudo-random order, and counterbalanced during the session.

## Neural data recording and analysis

394 At the beginning of each recording session the mice were head-fixed and had the elastomer removed for skull  
395 exposure. One or two 128-channel silicon probes were then acutely inserted above the previously prepared  
396 craniotomies using a micromanipulator. For mPFC recordings, electrodes were slowly lowered up until -2.0  
397 mm ventral to Bregma. In CA1 recordings the electrophysiological signal was monitored for high power over  
398 the ripple frequency band (150-300 Hz), and spiking activity (600-2000 Hz). Electrodes were placed so that  
399 the highest ripple power and spiking activity were localized in the middle of the probe. Spike sorting was  
400 automatically done using Kilosort and visually inspected using ‘phy’ gui (<https://github.com/cortex-lab/phy>).  
401 Following analysis, unless specified otherwise, were done using custom-made Matlab scripts.

### Decoding of trial time

402  
403 Temporal coding at the single session level was assessed through the ability of decoding the time of the  
404 trial using a Bayesian classifier. For each session, we first binned trials into 100 ms bins with no overlap. The  
405 number of trials for each stimulus was balanced between conditions. A naive-Bayesian classifier was trained  
406 with a leave-one-out cross validation scheme in for each iteration a pair of CS+/CS- trial was used to test. The  
407 classifier modeled neuronal firing as an inhomogeneous Poisson process whose rate was a function of trial time  
408 and neurons were assumed to be independent given trial time.

409 Using test samples of a given time bin, we estimated its probability of being decoded as each of the other  
410 time bins of the trial. We then stacked the probability distributions of all the time bins into a confusion matrix  
411 (‘time-decoding’ matrix), pseudo-colored with the probability of predicting a tested time bin in the x-axis, as  
412 one of the different time bins in the y-axis. Decoding probability values of each pair of time bins were z-scored  
413 using the mean and the standard deviation from a surrogate distribution (100 surrogates). Surrogates were  
414 computed by shuffling the time bin identity of each trial in the training set before computing the Bayesian  
415 decoder in each fold.

416 Temporal sequences could be seen in the time-decoding matrix as high decoding values concentrated near  
417 the main diagonal. We selected two windows to investigate the emergence of temporal sequences, one at the  
418 stimulus onset (0-0.5 s; 100-ms-bins) and another after reward onset (3.1-3.6 s; 100-ms-bins). Temporal sequence  
419 strength was then defined as the mean probability over the main diagonal of time-decoding matrices at those  
420 windows. Reward window was delayed 100 ms from reward presentation based on the echo of the stimulus  
421 temporal sequence, which started at this moment. This was probably due to the fact that the animal needs to  
422 lick the reward to perceive it, which can introduce a sampling delay.

423 To assess significance of the temporal sequences, their strength was tested against the strength of a null

424 temporal sequence of equal size, extracted from pre-stimulus period (Wilcoxon sign-rank test). Comparison  
425 between temporal sequence strength across different areas and learning condition was done using aligned-rank  
426 transform in order to normalize non-parametric data. The equivalent of a two-way Anova was then performed  
427 (see ARTool toolbox, Wobbrock et al. (2011)).

428 US echo in CS+ (or CS-) temporal sequences was evaluated by analyzing the probabilities of decoding time  
429 bins of reward period (after US presentation) as time bins up to the end of trace period. This was done to  
430 avoid influences on the strength of the US temporal sequence itself on the echo estimation. Echo strength was  
431 computed in a similar way as the temporal sequence strength.

### 432 **Decoding of stimulus identity**

433 We performed a cross-validated classification analysis to investigate the stability of stimulus representations.  
434 Neuronal activity was divided into bins of 200 ms with no overlap and used to train an ensemble of support-  
435 vector machines (SVM) binary classifiers. Each binary classifier was trained to classify CS+ and CS- trials  
436 using the activity of a given time bin. We then used test bins from previous, subsequent, or current times to see  
437 how good the prediction could be generalized. The number of CS+ and CS- samples was always balanced and  
438 paired prior to training. Because the size of sample pool was different when training and testing in the same  
439 time bin compared to training and testing with different time bins, we used different cross-validation schemes  
440 for those two situations. In the first case (training and testing in the same time bin), we used a leave-one-out  
441 cross-validation, applied to pairs of CS+ and CS- trials. In the second case (training and testing bins different),  
442 we used the entire pool of trials to train, testing in all trials from the other time bin.

443 For each of those two cases we also trained surrogate classifiers (100 surrogates) in which the identity of the  
444 training trials was randomized. We then used the surrogate distribution of performance to normalize (z-score)  
445 the performance values of each classifier. Similar to the time decoding matrices, classifiers with different training  
446 and testing bins were stacked together forming a trial-type confusion matrix with training time bin in the y-axis  
447 and testing (time) bin in the x-axis. Notice that in those matrices we omit the main diagonal, that has different  
448 sample statistics and cross-validation scheme. The main diagonal is shown separately.

### 449 **Computing hidden Markov models**

450 To investigate whether stimulus identity was encoded by fast co-activation of neuronal assemblies, we first  
451 binned spikes in 20-ms bins with no overlap. HMMs were computed using Linderman et al. (2020) and assum-  
452 ing that neuron's firing rate followed a Poisson distribution. Because during training of HMMs each trial is  
453 initialized in the same state, we included an additional second before the stimulus in those analyses to account  
454 for stabilization of states (i.e., training was done using 2 s before CS up to 1 s after US). For each session, CS+  
455 and CS- trials were balanced and split in a 5-fold cross validation scheme. The Bayesian information criterion  
456 (BIC; Recanatesi et al. (2022)) was used to select the best number of hidden states of each model (ranging from  
457 2 to 20). Using Akaike information criterion instead held more states, but qualitatively similar results (data  
458 not shown).

459 After selecting the number of hidden states, we used the best model to predict the posterior probability of  
460 each state across trials. We then defined a state as 'active' whenever that was the most-likely state, allowing us

461 to have a mean state activation during stimulus and trace period (Mazzucato et al. (2019, 2015)). We looked  
462 for hidden states with significantly different activation in CS+ and CS- trials during the stimulus and trace  
463 periods ( $p < 0.05$ , Wilcoxon ranksum test). For this analysis data was preprocessed defining valid trials for each  
464 state as trials with at least one activation. This was done to avoid permanent state transitions due to changes  
465 in recording stability occurring across the session. To account for that, for each state only trials with at least  
466 one activation were taken into consideration. CS+ and CS- coding states were then defined as states that  
467 were significantly more active during CS+ and CS- ( $p < 0.05$ ; Wilcoxon signed-rank tests), respectively. This  
468 same analysis was repeated using more conservative criteria for state activation (Supp. Figure S7). We used a  
469 threshold of 0.6 for CA1 and 0.8 for PFC, accordingly to the probability distribution of states in the two areas  
470 (Supp. Figure S5D,F). There was no qualitative difference between the results using the most-likely state and  
471 the conservative thresholds.

472 We also computed the state activation triggered by the first lick of the trial focusing on CS+ and CS-  
473 coding states. To avoid effects driven by the stimulus, we restricted this analysis to trials in which the first lick  
474 happened at least 1 s after the stimulus onset. Also, we computed the inter-lick interval distribution of the licks  
475 pooled across all animals to have an upper bound estimation of the delay between the onset and detection of  
476 the licks (Figure S7 E).

477 We used the simultaneous recordings to compute the correlation and mutual information between PFC and  
478 CA1 hidden states. To compute the mutual information across the trials we first computed the most likely  
479 state of each 20-ms bin (i.e., the state with higher probability). Then, the adjusted mutual information was  
480 computed in bins of 100 ms (5 20-ms bins), separately for CS+ and CS- trials.

### 481 **State sequence index**

482 In order to evaluate whether HMM states could also capture the temporal sequences unveiled by the time-  
483 decoding matrices, we computed a (state) sequence index. First, for each trial we computed the activation  
484 rank of the states present in a given window (Supp. Figure S6A). State rank was defined as the order of the  
485 mean activation time within the window. The ranks of each trial were then accumulated in a state-rank matrix,  
486 from which the mutual information (MI) was extracted (Supp. Figure S6B-C). A surrogate MI distribution  
487 was computed by randomizing the ranks on each trial independently. The sequence index was then defined by  
488 the MI between state activation and rank minus the average surrogate MI (i.e., an unbiased MI). The sequence  
489 index was then computed using a 5 s sliding window. Notice that differently from other methods to investigate  
490 sequence activation, the sequence index defined here does not require a template sequence, being suited for  
491 unsupervised sequence discovery over aligned events.

## Acknowledgments

492 We thank M.B. Maidana Capitán, R. Pedrosa and V. Lopes-dos-Santos for fruitful discussions and feedback in  
493 earlier versions of the manuscript. Funding was provided by a German Studienstiftung fellowship (to JK), by  
494 the Dutch NWA 'Bio-Art' project (to FPB), and by the NWO Top-grant no. 612.001.853 (to FPB).

## Data and code availability

495 The data and codes used in this study are partially reported on the Donders Repository ([https://doi.org/](https://doi.org/10.34973/hp7x-4241)  
496 [10.34973/hp7x-4241](https://doi.org/10.34973/hp7x-4241)) and available upon reasonable request.

## Author contributions

497 Conceptualization, J.K. and F.B.; Methodology, B.S., J.K., L.M. and F.B.; Experiments, J.K.; Formal Analysis,  
498 B.S.; Resources, F.B.; Writing – Original Draft, B.S.; Writing – Reviewing & Editing, B.S., J.K., L.M., F.B.;  
499 Supervision, L.M. and F.B.;

## Supplementary Figures and Methods

### 500 **Measuring dimensionality of temporal representations**

501 To calculate how the dimensionality of the stimulus representation varied over the trial. For that, we used  
502 principal component analysis to computed a relative dimensionality of the populational activity for each time  
503 bin. This measure was defined as ratio between the amount of principal components that accounted for 90% of  
504 the variance in a given time bin and the respective amount computed during the pre-stimulus period. We found  
505 that both during CS+ and CS- trials, CA1 neural activity showed a decrease in dimensionality after the stimulus  
506 onset (i.e., when temporal sequences appeared) and this effect was present both before and after learning. On  
507 the other hand, PFC showed a similar decrease, but restricted to overtrained sessions (Figure S2B).



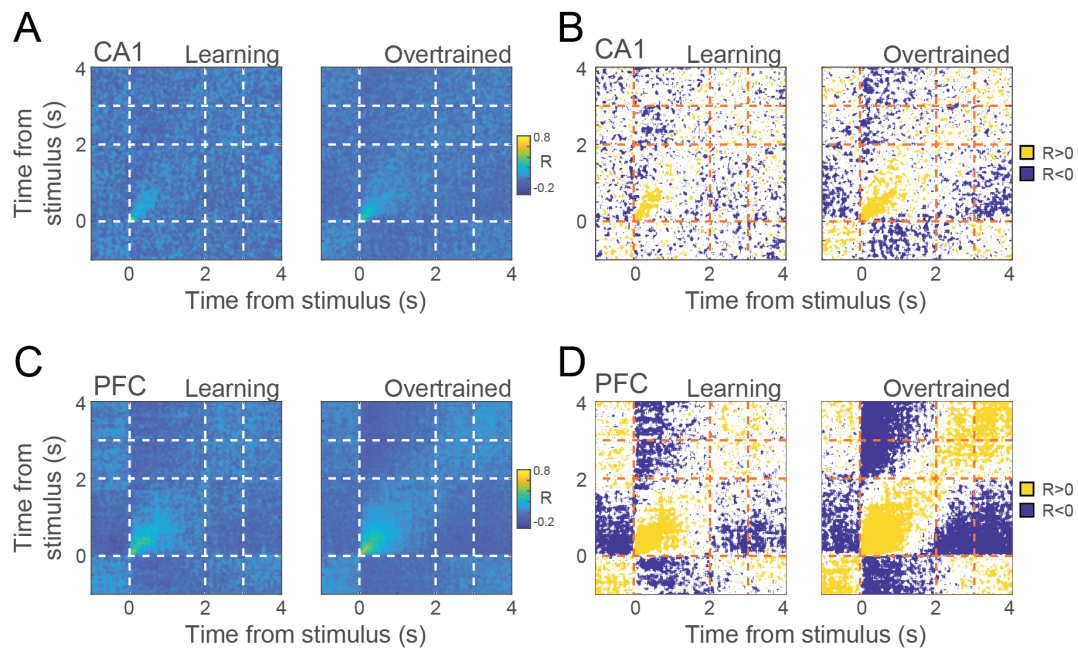

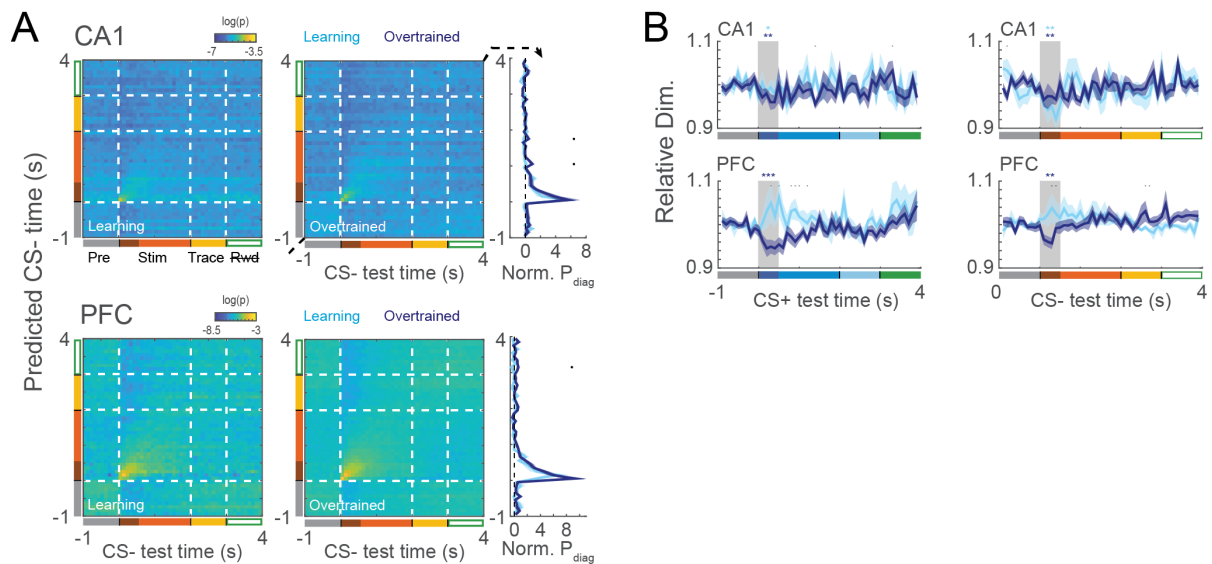

Figure S2: **Emergence of temporal sequences in CS-**. **A**. Mean time decoding matrices for learning and overtrained sessions together with the average probability on the main diagonal (rightmost panel). Decoders were trained and tested using CS- activity from CA1 (top) and PFC (bottom). Black dots denote times in which learning and overtrained decoding are different (Wilcoxon ranksum,  $p < 0.05$ ). **B**. Relative dimensionality of the population activity over time for CS+ (left) and CS- (right) trials. Relative dimensionality was measured as the fraction of principal components necessary to explain 90% of the data variance over each time bin. Note the lower dimensionality after stimulus presentation (in the same period of CS+ and CS- temporal representations) in CA1 before and after learning. PFC sessions showed a similar decrease only in overtrained sessions.

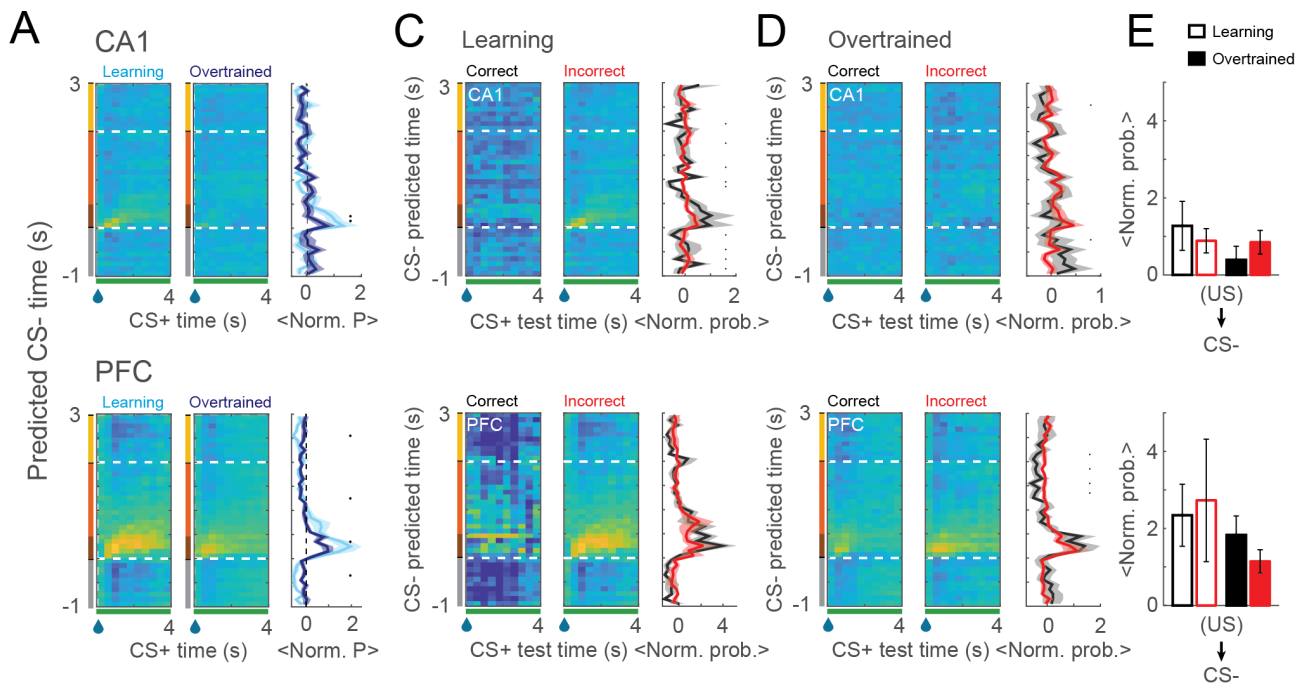

Figure S3: **Similarity between CS- and US temporal representations is not modulated by learning or error signal of trial outcome.** **A.** Similar to Figure 3, but using CS- trials for training. Time decoding matrices trained using CS- activity before the US, and used to decode US time (left and middle). Average (normalized) probabilities for the US period are shown for learning and overtrained sessions (right). **B.** Mean decoding in the temporal echo window for CA1 and PFC. **C-D.** Time-decoding matrices as in A, but showing the temporal echo in correct and incorrect trials from learning (C) and overtrained (D) sessions. **E.** Average performance on the temporal echo window (main diagonal) for CA1 (top) and PFC (bottom). Aligned rank transform followed by a two-way ANOVA using trial outcome (i.e., correct vs. incorrect) and learning condition as factors for each area independently revealed no significant interaction or main effect in either area. Shaded areas and errorbars denote SEM. Black dots denote  $p < 0.05$ .

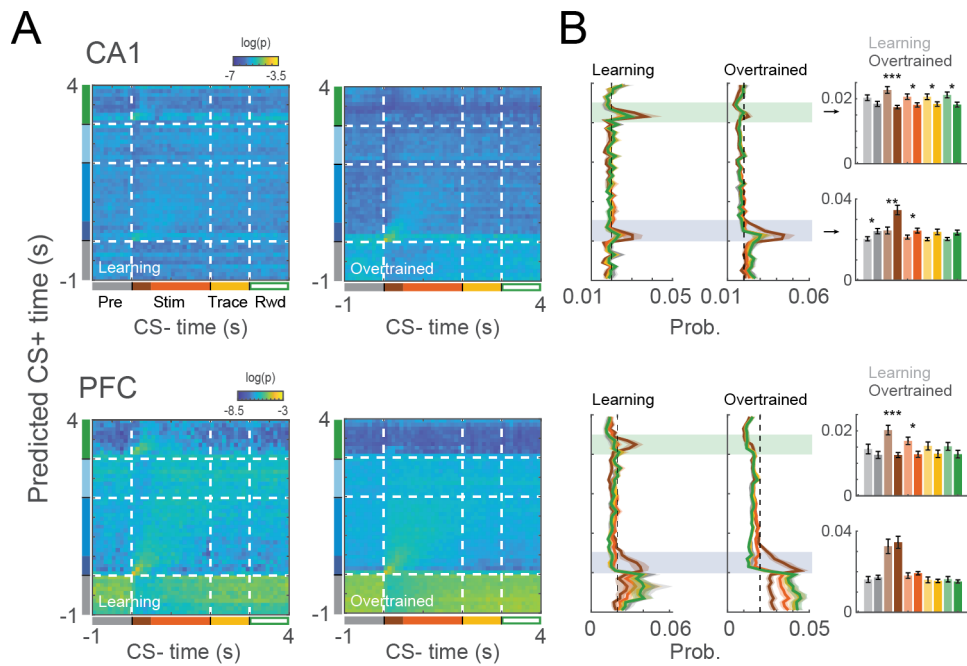

Figure S4: **US echo in CS- before and after learning.** **A.** Time decoding matrices trained using CS+ activity before the US, and used to decode US time in CS- trials during learning (left) and overtrained (right) sessions for CA1 and PFC. **B.** Average decoding probability for testing bins in different periods of the trial (right and middle), together with the mean probability in the CS and US temporal windows (shaded rectangles). Notice the decrease of similarity between CS- stimulus transient and US after learning for both areas (dark brown bars). Shaded areas and errorbars denote SEM. \*:  $p < 0.05$ ; \*\*:  $p < 0.01$ ; \*\*\*:  $p < 0.001$ ; Wilcoxon ranksum test.

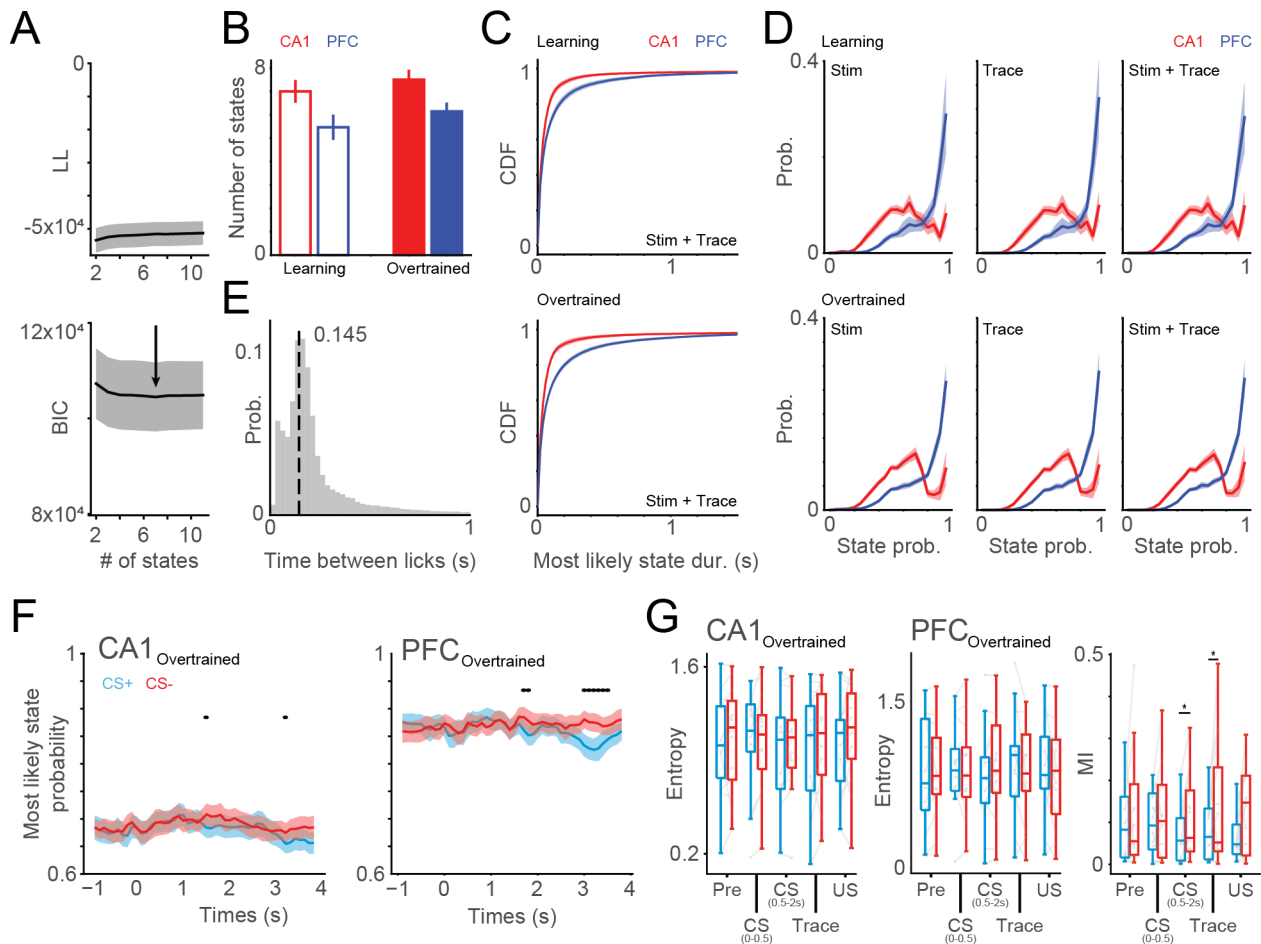

Figure S5: **HMM states characterization.** **A.** HMM model selection was done using the mean Bayesian information criterion (BIC) over the different cross-validation folds. The model with lowest BIC was used. **B.** Number of states in CA1 and PFC before and after learning. **C.** Cumulative distribution of most likely state duration during CS presentation and trace period. **D.** Most likely state probability distribution during CS, trace and both periods together. Note the higher values in PFC states. **E.** Distribution of the time between consecutive licks. Compare with PFC coding state activation before the first lick. **F.** Most likely state probability over the trial for CA1 (top) and PFC (bottom) overtrained sessions during CS+ and CS- trials. **G.** Entropy (left, middle) and mutual information (right) of most likely state for CA1 and PFC during CS+ and CS- trials.

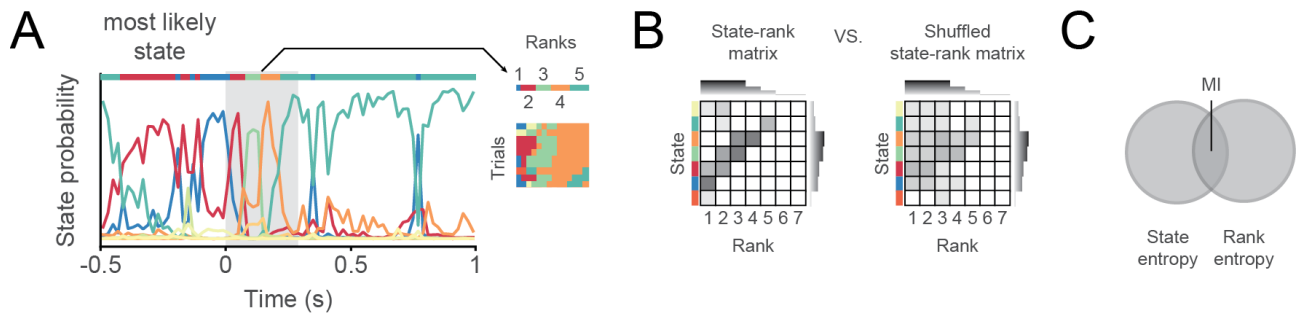

Figure S6: **Quantifying state sequences.** **A.** Example of state probability along a trial. The most likely state of a window of interest was extracted for each trial, and the rank of states was computed using the order of mean activation time of each state. **B.** State-rank matrix computed using the trials shown in A (left) and an example of a shuffled matrix (right). State-rank matrices indicate how many times a state appear in each rank. Shuffled matrices were computed by randomizing ranks on each trial independently, in order to keep the same number of activation for each state and maximal rank per trial. **C.** The mutual information extracted from the state-rank matrices was an indirect metric of how much information state activation unveils on state rank.

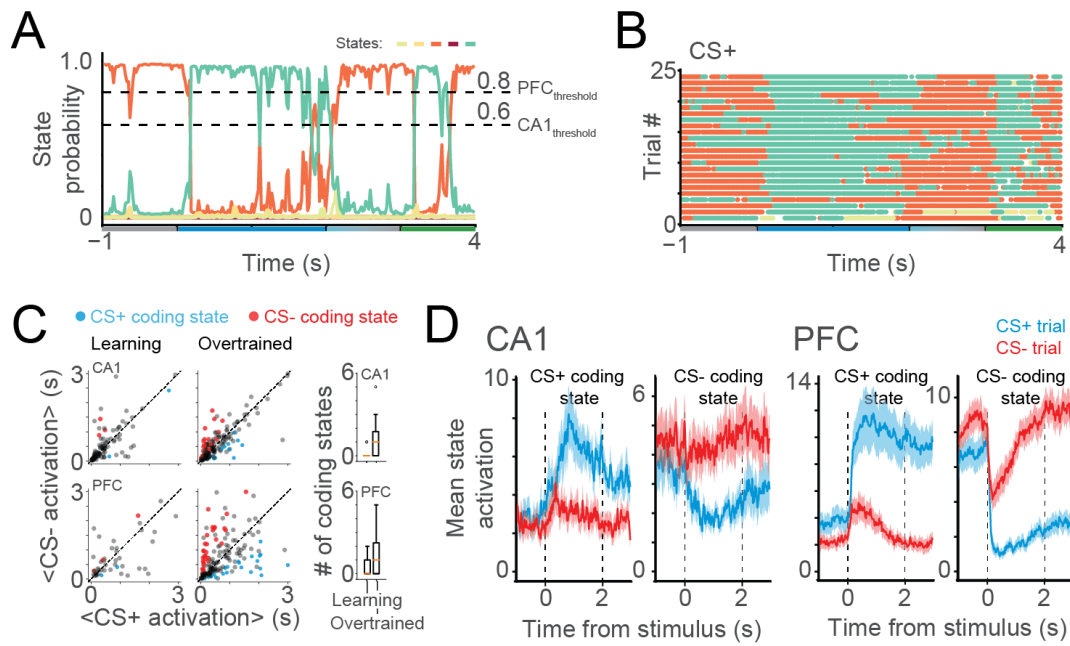

Figure S7: **Emergence of CS coding states using conservative thresholds.** **A.** Probability of state activation of an example PFC trial. Dashed line show the threshold for CA1 (0.6) and PFC (0.8) used to consider state activation. **B.** Example plot showing activation of states in A over different CS+ trials. **C.** Average CS+ and CS- activation during trace and stimulus period for every state in learning (left) and overtrained (middle) sessions, together with boxplots showing the distribution of coding states per session (right). Coding states appear after learning even when using conservative thresholds. Color denotes CS+ (blue) and CS- (red) coding states. **D.** Average of CS+ and CS- coding states activation over time in both areas. Threshold-defined coding states show a similar profile to the ones defined by the most-likely states.

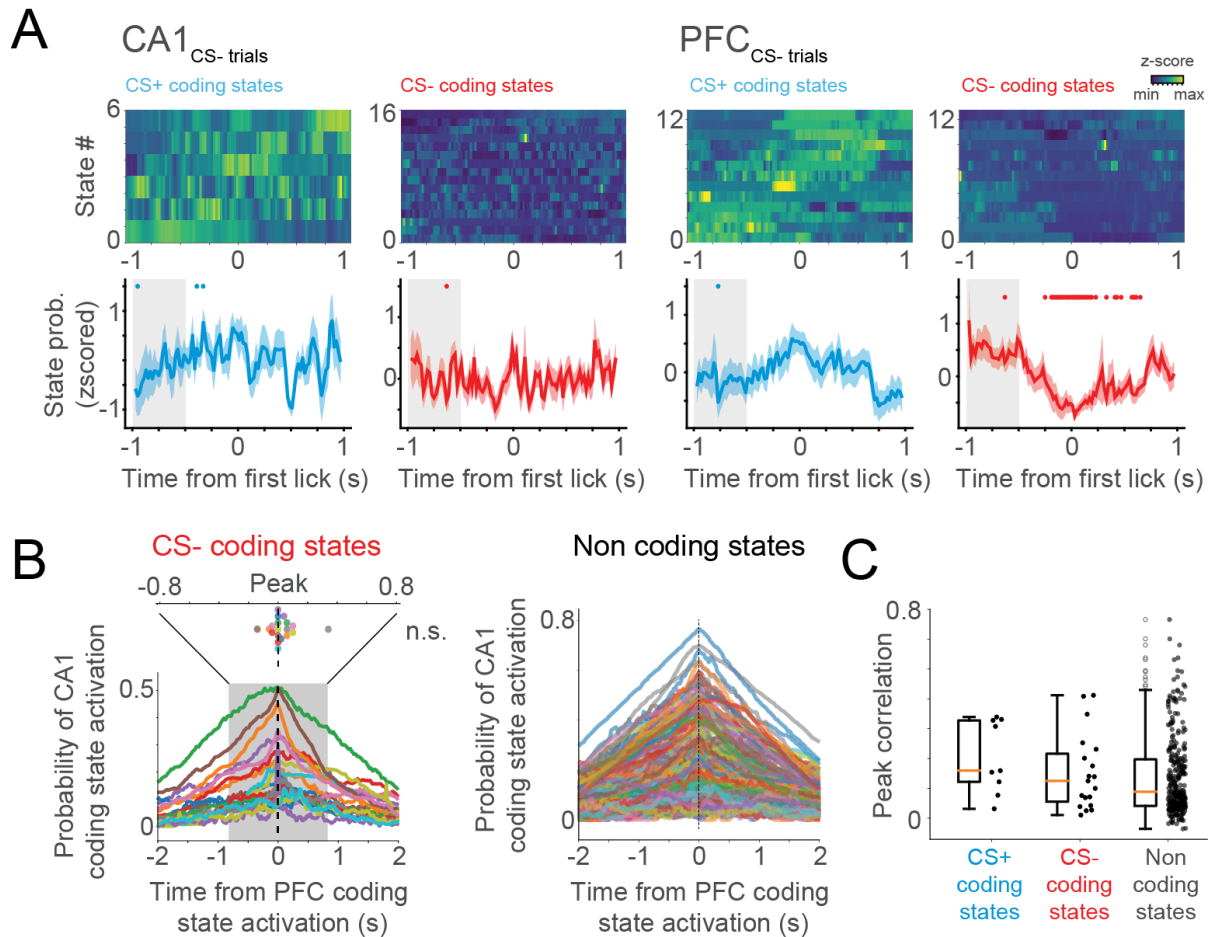

**Figure S8: CS coding states in wrong CS- trials and CA1-PFC state correlation.** **A.** Coding state's activation during overtrained sessions and centered on the first lick of the trials. Similar to Figure 7E, but for CS- (wrong) trials. State activation is shown for both CS+ and CS- coding states of CA1 (left) and PFC (right). Notice that PFC coding states seem to predict lick onset even in CS- trials, although this was significant only for the inhibition of CS- coding state. **B.** Cross-correlation between CA1 and PFC CS- and non- coding states activation. Differently from CS+ coding states, CS- and non- coding states in PFC don't seem to precede CA1 states. **C.** Distribution of the peak correlation values of traces in B. There was no significant difference in correlation between CS+, CS- and non- coding states (Wilcoxon ranksum test).



## References

- 508 Mohsin S Ahmed, James B Priestley, Angel Castro, Fabio Stefanini, Ana Sofia Solis Canales, Elizabeth M  
509 Balough, Erin Lavoie, Luca Mazzucato, Stefano Fusi, and Attila Losonczy. Hippocampal network reorgani-  
510 zation underlies the formation of a temporal association memory. *Neuron*, 107(2):283–291, 2020. Publisher:  
511 Elsevier.
- 512 Wael F Asaad, Peter M Lauro, János A Perge, and Emad N Eskandar. Prefrontal neurons encode a solu-  
513 tion to the credit-assignment problem. *Journal of Neuroscience*, 37(29):6995–7007, 2017. Publisher: Soc  
514 Neuroscience.
- 515 E. H. Baeg. Fast Spiking and Regular Spiking Neural Correlates of Fear Conditioning in the Medial Prefrontal  
516 Cortex of the Rat. *Cerebral Cortex*, 11(5):441–451, May 2001. ISSN 14602199. doi: 10.1093/cercor/11.5.441.  
517 URL <https://academic.oup.com/cercor/article-lookup/doi/10.1093/cercor/11.5.441>.
- 518 Debra A Bangasser, David E Waxler, Jessica Santollo, and Tracey J Shors. Trace conditioning and the hip-  
519 pocampus: the importance of contiguity. *Journal of Neuroscience*, 26(34):8702–8706, 2006. Publisher: Soc  
520 Neuroscience.
- 521 Francesco P Battaglia, Karim Benchenane, Anton Sirota, Cyriel MA Pennartz, and Sidney I Wiener. The  
522 hippocampus: hub of brain network communication for memory. *Trends in cognitive sciences*, 15(7):310–318,  
523 2011. Publisher: Elsevier.
- 524 Alberto Bernacchia, Hyojung Seo, Daeyeol Lee, and Xiao-Jing Wang. A reservoir of time constants for memory  
525 traces in cortical neurons. *Nature Neuroscience*, 14(3):366–372, March 2011. ISSN 1546-1726. doi: 10.1038/  
526 nn.2752. URL <https://www.nature.com/articles/nn.2752>.
- 527 Brian G. Burton, Vincent Hok, Etienne Save, and Bruno Poucet. Lesion of the ventral and intermediate  
528 hippocampus abolishes anticipatory activity in the medial prefrontal cortex of the rat. *Behavioural Brain*  
529 *Research*, 199(2):222–234, May 2009. ISSN 0166-4328. doi: 10.1016/j.bbr.2008.11.045. URL <https://www.sciencedirect.com/science/article/pii/S0166432808006621>.
- 531 Howard Eichenbaum. Time cells in the hippocampus: a new dimension for mapping memories. *Nature Reviews*  
532 *Neuroscience*, 15(11):732–744, 2014. Publisher: Nature Publishing Group.
- 533 Howard Eichenbaum. Memory: organization and control. *Annual review of psychology*, 68:19–45, 2017a. Pub-  
534 lisher: Annual Reviews.
- 535 Howard Eichenbaum. Prefrontal–hippocampal interactions in episodic memory. *Nature Reviews Neuroscience*,  
536 18(9):547–558, 2017b. Publisher: Nature Publishing Group.
- 537 David R Euston, Aaron J Gruber, and Bruce L McNaughton. The role of medial prefrontal cortex in memory  
538 and decision making. *Neuron*, 76(6):1057–1070, 2012. Publisher: Elsevier.

- 539 Shintaro Funahashi, Matthew V Chafee, and Patricia S Goldman-Rakic. Prefrontal neuronal activity in rhe-  
540 sus monkeys performing a delayed anti-saccade task. *Nature*, 365(6448):753–756, 1993. Publisher: Nature  
541 Publishing Group.
- 542 Marieke R. Gilmartin and Matthew D. McEchron. Single neurons in the medial prefrontal cortex of the rat  
543 exhibit tonic and phasic coding during trace fear conditioning. *Behavioral Neuroscience*, 119(6):1496–1510,  
544 December 2005. ISSN 1939-0084, 0735-7044. doi: 10.1037/0735-7044.119.6.1496. URL <http://doi.apa.org/getdoi.cfm?doi=10.1037/0735-7044.119.6.1496>.
- 546 Patricia S Goldman-Rakic. Cellular basis of working memory. *Neuron*, 14(3):477–485, 1995. Publisher: Elsevier.
- 547 Aaron J. Gruber, Gwendolyn G. Calhoun, Igor Shusterman, Geoffrey Schoenbaum, Matthew R. Roesch, and  
548 Patricio O’Donnell. More Is Less: A Disinhibited Prefrontal Cortex Impairs Cognitive Flexibility. *Journal of*  
549 *Neuroscience*, 30(50):17102–17110, December 2010. ISSN 0270-6474, 1529-2401. doi: 10.1523/JNEUROSCI.  
550 4623-10.2010. URL <https://www.jneurosci.org/content/30/50/17102>.
- 551 Shoai Hattori, Lillian Chen, Craig Weiss, and John F. Disterhoft. Robust hippocampal responsivity during  
552 retrieval of consolidated associative memory. *Hippocampus*, 25(5):655–669, May 2015. ISSN 1050-9631, 1098-  
553 1063. doi: 10.1002/hipo.22401. URL <https://onlinelibrary.wiley.com/doi/10.1002/hipo.22401>.
- 554 James M Hyman, Liya Ma, Emili Balaguer-Ballester, Daniel Durstewitz, and Jeremy K Seamans. Contextual  
555 encoding by ensembles of medial prefrontal cortex neurons. *Proceedings of the National Academy of Sciences*,  
556 109(13):5086–5091, 2012. Publisher: National Acad Sciences.
- 557 Shantanu P Jadhav, Gideon Rothschild, Demetris K Roumis, and Loren M Frank. Coordinated excitation  
558 and inhibition of prefrontal ensembles during awake hippocampal sharp-wave ripple events. *Neuron*, 90(1):  
559 113–127, 2016. Publisher: Elsevier.
- 560 Karola Kaefer, Michele Nardin, Karel Blahna, and Jozsef Csicsvari. Replay of behavioral sequences in the  
561 medial prefrontal cortex during rule switching. *Neuron*, 106(1):154–165, 2020. Publisher: Elsevier.
- 562 Raymond P Kesner, Michael R Hunsaker, and Paul E Gilbert. The role of CA1 in the acquisition of an  
563 object-trace-odor paired associate task. *Behavioral neuroscience*, 119(3):781, 2005. Publisher: American  
564 Psychological Association.
- 565 J-R. King and S. Dehaene. Characterizing the dynamics of mental representations: the temporal generalization  
566 method. *Trends in Cognitive Sciences*, 18(4):203–210, April 2014. ISSN 1364-6613. doi: 10.1016/j.tics.2014.  
567 01.002. URL <https://www.sciencedirect.com/science/article/pii/S1364661314000199>.
- 568 Takashi Kitamura, Christopher J Macdonald, and Susumu Tonegawa. Entorhinal–hippocampal neuronal circuits  
569 bridge temporally discontinuous events. *Learning & Memory*, 22(9):438–443, 2015. Publisher: Cold Spring  
570 Harbor Lab.

- 571 Jan L Klee, Bryan C Souza, and Francesco P Battaglia. Learning differentially shapes prefrontal and hip-  
572 pocampal activity during classical conditioning. *eLife*, 10:e65456, October 2021. ISSN 2050-084X. doi:  
573 10.7554/eLife.65456. URL <https://elifesciences.org/articles/65456>.
- 574 Antonio H Lara and Jonathan D Wallis. The role of prefrontal cortex in working memory: a mini review.  
575 *Frontiers in systems neuroscience*, 9:173, 2015. Publisher: Frontiers.
- 576 Stefan Leutgeb, Jill K Leutgeb, Alessandro Treves, May-Britt Moser, and Edvard I Moser. Distinct ensem-  
577 ble codes in hippocampal areas CA3 and CA1. *Science*, 305(5688):1295–1298, 2004. Publisher: American  
578 Association for the Advancement of Science.
- 579 Scott Linderman, Benjamin Antin, David Zoltowski, and Joshua Glaser. SSM: Bayesian Learning and Inference  
580 for State Space Models. October 2020. URL <https://github.com/lindermanlab/ssm>.
- 581 Christopher J MacDonald, Kyle Q Lepage, Uri T Eden, and Howard Eichenbaum. Hippocampal “time cells”  
582 bridge the gap in memory for discontinuous events. *Neuron*, 71(4):737–749, 2011. Publisher: Elsevier.
- 583 Christopher J MacDonald, Stephen Carrow, Ryan Place, and Howard Eichenbaum. Distinct hippocampal time  
584 cell sequences represent odor memories in immobilized rats. *Journal of Neuroscience*, 33(36):14607–14616,  
585 2013. Publisher: Soc Neuroscience.
- 586 Emily L Mackevicius, Andrew H Bahle, Alex H Williams, Shijie Gu, Natalia I Denisenko, Mark S Goldman, and  
587 Michale S Fee. Unsupervised discovery of temporal sequences in high-dimensional datasets, with applications  
588 to neuroscience. *eLife*, 8:e38471, February 2019. ISSN 2050-084X. doi: 10.7554/eLife.38471. URL <https://doi.org/10.7554/eLife.38471>.
- 590 L. Mazzucato, G. La Camera, and A. Fontanini. Expectation-induced modulation of metastable activity under-  
591 lies faster coding of sensory stimuli. *Nature Neuroscience*, 22(5):787–796, May 2019. ISSN 1546-1726. doi:  
592 10.1038/s41593-019-0364-9. URL <https://www.nature.com/articles/s41593-019-0364-9>.
- 593 Luca Mazzucato, Alfredo Fontanini, and Giancarlo La Camera. Dynamics of Multistable States during Ongoing  
594 and Evoked Cortical Activity. *Journal of Neuroscience*, 35(21):8214–8231, May 2015. ISSN 0270-6474, 1529-  
595 2401. doi: 10.1523/JNEUROSCI.4819-14.2015. URL <https://www.jneurosci.org/content/35/21/8214>.
- 596 Matthew D. McEchron and John F. Disterhoft. Sequence of Single Neuron Changes in CA1 Hippocampus  
597 of Rabbits During Acquisition of Trace Eyeblink Conditioned Responses. *Journal of Neurophysiology*, 78  
598 (2):1030–1044, August 1997. ISSN 0022-3077, 1522-1598. doi: 10.1152/jn.1997.78.2.1030. URL <https://www.physiology.org/doi/10.1152/jn.1997.78.2.1030>.
- 600 Matthew D. McEchron and John F. Disterhoft. Hippocampal encoding of non-spatial trace con-  
601 ditioning. *Hippocampus*, 9(4):385–396, 1999. ISSN 1050-9631, 1098-1063. doi: 10.1002/(SICI)  
602 1098-1063(1999)9:4<385::AID-HIPO5>3.0.CO;2-K. URL [https://onlinelibrary.wiley.com/doi/10.](https://onlinelibrary.wiley.com/doi/10.1002/(SICI)1098-1063(1999)9:4<385::AID-HIPO5>3.0.CO;2-K)  
603 [1002/\(SICI\)1098-1063\(1999\)9:4<385::AID-HIPO5>3.0.CO;2-K](https://onlinelibrary.wiley.com/doi/10.1002/(SICI)1098-1063(1999)9:4<385::AID-HIPO5>3.0.CO;2-K).

- 604 Earl K. Miller. The prefrontal cortex and cognitive control. *Nature Reviews Neuroscience*, 1(1):59–65, October  
605 2000. ISSN 1471-0048. doi: 10.1038/35036228. URL <https://www.nature.com/articles/35036228>.
- 606 Earl K. Miller and Jonathan D. Cohen. An Integrative Theory of Prefrontal Cortex Function. *Annual Review of*  
607 *Neuroscience*, 24(1):167–202, March 2001. ISSN 0147-006X, 1545-4126. doi: 10.1146/annurev.neuro.24.1.167.  
608 URL <https://www.annualreviews.org/doi/10.1146/annurev.neuro.24.1.167>.
- 609 Edvard I. Moser, Emilio Kropff, and May-Britt Moser. Place Cells, Grid Cells, and the Brain’s Spatial Repre-  
610 sentation System. *Annual Review of Neuroscience*, 31(1):69–89, July 2008. ISSN 0147-006X, 1545-4126. doi:  
611 10.1146/annurev.neuro.31.061307.090723. URL [https://www.annualreviews.org/doi/10.1146/annurev.](https://www.annualreviews.org/doi/10.1146/annurev.neuro.31.061307.090723)  
612 [neuro.31.061307.090723](https://www.annualreviews.org/doi/10.1146/annurev.neuro.31.061307.090723).
- 613 May-Britt Moser, David C. Rowland, and Edvard I. Moser. Place Cells, Grid Cells, and Memory. *Cold Spring*  
614 *Harbor Perspectives in Biology*, 7(2):a021808, February 2015. ISSN , 1943-0264. doi: 10.1101/cshperspect.  
615 a021808. URL <http://cshperspectives.cshlp.org/content/7/2/a021808>.
- 616 Masayoshi Murakami, Hanan Shteingart, Yonatan Loewenstein, and Zachary F. Mainen. Distinct Sources  
617 of Deterministic and Stochastic Components of Action Timing Decisions in Rodent Frontal Cortex. *Neu-*  
618 *ron*, 94(4):908–919.e7, May 2017. ISSN 0896-6273. doi: 10.1016/j.neuron.2017.04.040. URL <https://www.sciencedirect.com/science/article/pii/S0896627317303975>.
- 620 Yuji Naya and Wendy A. Suzuki. Integrating What and When Across the Primate Medial Temporal Lobe.  
621 *Science*, 333(6043):773–776, 2011. doi: 10.1126/science.1206773. URL [https://www.science.org/doi/](https://www.science.org/doi/abs/10.1126/science.1206773)  
622 [abs/10.1126/science.1206773](https://www.science.org/doi/abs/10.1126/science.1206773). \_eprint: <https://www.science.org/doi/pdf/10.1126/science.1206773>.
- 623 John O’Keefe and Michael L Recce. Phase relationship between hippocampal place units and the EEG theta  
624 rhythm. *Hippocampus*, 3(3):317–330, 1993. Publisher: Wiley Online Library.
- 625 James M Otis, Vijay MK Namboodiri, Ana M Matan, Elisa S Voets, Emily P Mohorn, Oksana Kosyk, Jenna A  
626 McHenry, J Elliott Robinson, Shanna L Resendez, Mark A Rossi, and others. Prefrontal cortex output circuits  
627 guide reward seeking through divergent cue encoding. *Nature*, 543(7643):103–107, 2017. Publisher: Nature  
628 Publishing Group.
- 629 Eva Pastalkova, Vladimir Itskov, Asohan Amarasingham, and Gyorgy Buzsaki. Internally Generated Cell  
630 Assembly Sequences in the Rat Hippocampus. *Science*, 321(5894):1322–1327, September 2008a. ISSN 0036-  
631 8075, 1095-9203. doi: 10.1126/science.1159775. URL [https://www.science.org/doi/10.1126/science.](https://www.science.org/doi/10.1126/science.1159775)  
632 [1159775](https://www.science.org/doi/10.1126/science.1159775).
- 633 Eva Pastalkova, Vladimir Itskov, Asohan Amarasingham, and Gyorgy Buzsaki. Internally generated cell assem-  
634 bly sequences in the rat hippocampus. *Science*, 321(5894):1322–1327, 2008b. Publisher: American Association  
635 for the Advancement of Science.

- 636 Adrien Peyrache, Mehdi Khamassi, Karim Benchenane, Sidney I Wiener, and Francesco P Battaglia. Replay  
637 of rule-learning related neural patterns in the prefrontal cortex during sleep. *Nature neuroscience*, 12(7):  
638 919–926, 2009. Publisher: Nature Publishing Group.
- 639 Bradley R Postle. Working memory as an emergent property of the mind and brain. *Neuroscience*, 139(1):  
640 23–38, 2006. Publisher: Elsevier.
- 641 Wayne E Pratt and Sheri J. Y Mizumori. Neurons in rat medial prefrontal cortex show anticipatory rate changes  
642 to predictable differential rewards in a spatial memory task. *Behavioural Brain Research*, 123(2):165–183,  
643 September 2001. ISSN 0166-4328. doi: 10.1016/S0166-4328(01)00204-2. URL <https://www.sciencedirect.com/science/article/pii/S0166432801002042>.
- 645 Alison R Preston and Howard Eichenbaum. Interplay of hippocampus and prefrontal cortex in memory. *Current*  
646 *Biology*, 23(17):R764–R773, 2013. Publisher: Elsevier.
- 647 Rene Quilodran, Marie Rothe, and Emmanuel Procyk. Behavioral Shifts and Action Valuation in the Anterior  
648 Cingulate Cortex. *Neuron*, 57(2):314–325, January 2008. ISSN 0896-6273. doi: 10.1016/j.neuron.2007.11.031.  
649 URL <https://www.sciencedirect.com/science/article/pii/S0896627307010215>.
- 650 Jonathan D. Raybuck and K. Matthew Lattal. Bridging the interval: Theory and neurobiology of trace condi-  
651 tioning. *Behavioural Processes*, 101:103–111, January 2014. ISSN 0376-6357. doi: 10.1016/j.beproc.2013.08.  
652 016. URL <https://www.sciencedirect.com/science/article/pii/S0376635713001915>.
- 653 Stefano Recanatesi, Ulises Pereira-Obilinovic, Masayoshi Murakami, Zachary Mainen, and Luca Mazzu-  
654 cato. Metastable attractors explain the variable timing of stable behavioral action sequences. *Neuron*,  
655 110(1):139–153.e9, January 2022. ISSN 0896-6273. doi: 10.1016/j.neuron.2021.10.011. URL <https://www.sciencedirect.com/science/article/pii/S0896627321007790>.
- 657 Azza Sellami, Alice Shaam Al Abed, Laurent Brayda-Bruno, Nicole Etchamendy, Stephane Valerio, Marie Oule,  
658 Laura Pantaleon, Valerie Lamothe, Mylene Potier, Katy Bernard, and others. Temporal binding function of  
659 dorsal CA1 is critical for declarative memory formation. *Proceedings of the National Academy of Sciences*,  
660 114(38):10262–10267, 2017. Publisher: National Acad Sciences.
- 661 Justin D Shin and Shantanu P Jadhav. Multiple modes of hippocampal–prefrontal interactions in memory-  
662 guided behavior. *Current opinion in neurobiology*, 40:161–169, 2016. Publisher: Elsevier.
- 663 Justin D Shin, Wenbo Tang, and Shantanu P Jadhav. Dynamics of awake hippocampal-prefrontal replay for  
664 spatial learning and memory-guided decision making. *Neuron*, 104(6):1110–1125, 2019. Publisher: Elsevier.
- 665 Paul R Solomon, Ellen R Vander Schaaf, Richard F Thompson, and Donald J Weisz. Hippocampus and trace  
666 conditioning of the rabbit’s classically conditioned nictitating membrane response. *Behavioral neuroscience*,  
667 100(5):729, 1986. Publisher: American Psychological Association.

- 668 Clara Kwon Starkweather, Samuel J Gershman, and Naoshige Uchida. The medial prefrontal cortex shapes  
669 dopamine reward prediction errors under state uncertainty. *Neuron*, 98(3):616–629, 2018. Publisher: Elsevier.
- 670 Kazumasa Z Tanaka, Aleksandr Pevzner, Anahita B Hamidi, Yuki Nakazawa, Jalina Graham, and Brian J  
671 Wiltgen. Cortical representations are reinstated by the hippocampus during memory retrieval. *Neuron*, 84  
672 (2):347–354, 2014. Publisher: Elsevier.
- 673 Jacob O. Wobbrock, Leah Findlater, Darren Gergle, and James J. Higgins. The aligned rank transform  
674 for nonparametric factorial analyses using only anova procedures. In *Proceedings of the SIGCHI Confer-*  
675 *ence on Human Factors in Computing Systems*, pages 143–146, Vancouver BC Canada, May 2011. ACM.  
676 ISBN 9781450302289. doi: 10.1145/1978942.1978963. URL [https://dl.acm.org/doi/10.1145/1978942.](https://dl.acm.org/doi/10.1145/1978942.1978963)  
677 1978963.
- 678 Byron M Yu, John P Cunningham, Gopal Santhanam, Stephen Ryu, Krishna V Shenoy, and Maneesh Sahani.  
679 Gaussian-process factor analysis for low-dimensional single-trial analysis of neural population activity. In  
680 *Advances in Neural Information Processing Systems*, volume 21. Curran Associates, Inc., 2008. URL [https:](https://proceedings.neurips.cc/paper/2008/hash/ad972f10e0800b49d76fed33a21f6698-Abstract.html)  
681 [//proceedings.neurips.cc/paper/2008/hash/ad972f10e0800b49d76fed33a21f6698-Abstract.html](https://proceedings.neurips.cc/paper/2008/hash/ad972f10e0800b49d76fed33a21f6698-Abstract.html).
